# Supplementary material for: Hard time to be parents? Sea urchin fishery shifts potential reproductive contribution of population onto the shoulders of the young adults
Source: PeerJ. 2017 Mar 8;5:e3067. doi: 10.7717/peerj.3067 (PMC5345490; doi:10.7717/peerj.3067)
Supplement: Supplemental Information 8 — This dataset shows all the sea urchin samples (of the three size classes examined) used for GSI analysis. TD, Test Diameter (mm); TW, Total Wet Weight (g); GW, Gonad Wet Weight (g); GSI, Gonadosomatic Index. [file peerj-05-3067-s008.xls]

## Sheet: Su Pallosu Bay
Area	Size	Code	TD	TW	GW	GSI	Sex
A	CS	6SA1G1	51	50.9	0.9	1.76817	M
A	CS	6SA1G2	50	57.03	2.9	5.08504	M
A	CS	6SA1G3	53	60.51	1.45	2.3963	M
A	CS	6SA1G4	52	63.92	1.16	1.81477	M
A	CS	6SA1G5	55	64.23	3.28	5.10665	F
A	CS	6SA1G6	53	57.67	2.24	3.88417	F
A	CS	6SA1G7	57	77.04	1.7	2.20665	F
A	CS	6SA1G8	55	63.61	1.2	1.8865	F
A	CS	6SA1G9	54	71.65	1.57	2.19121	F
A	CS	6SA1G10	52	62.04	0.72	1.16054	F
A	CS	6SA2G1	55	66.42	1.35	2.03252	F
A	CS	6SA2G2	56	65.35	0.73	1.11706	M
A	CS	6SA2G3	55	64.55	1.15	1.78156	F
A	CS	6SA2G4	53	56.97	1.11	1.94839	F
A	CS	6SA2G5	52	62.32	1.16	1.86136	M
A	CS	6SA2G6	54	63.9	1.83	2.86385	F
A	CS	6SA2G7	52	53.38	1.53	2.86624	M
A	CS	6SA2G8	52	56.07	0.46	0.820403	M
A	CS	6SA2G9	55	66.84	1.46	2.18432	F
A	CS	6SA2G10	53	61.37	1.01	1.64576	F
B	CS	6SB1G1	55	73.03	1.63	2.23196	F
B	CS	6SB1G2	56	68.04	1.76	2.58671	M
B	CS	6SB1G3	60	96.09	2.53	2.63295	M
B	CS	6SB1G4	62	90.46	1.7	1.87928	F
B	CS	6SB1G5	60	90.92	1.18	1.29784	F
B	CS	6SB1G6	55	62.23	2	3.21388	F
B	CS	6SB1G7	54	61.44	0.97	1.57878	F
B	CS	6SB1G8	56	61.97	1.49	2.40439	F
B	CS	6SB1G9	51	60.48	1.17	1.93452	M
B	CS	6SB1G10	52	58.61	0.94	1.60382	F
B	CS	6SB2G1	58	74.86	1.63	2.1774	M
B	CS	6SB2G2	55	69.13	1.46	2.11196	F
B	CS	6SB2G3	53	61.76	0.91	1.47345	M
B	CS	6SB2G4	54	60.02	0.86	1.43286	M
B	CS	6SB2G5	54	57.73	0.27	0.467694	F
B	CS	6SB2G6	51	58.6	1.12	1.91126	F
B	CS	6SB2G7	51	55.28	0.54	0.976845	F
B	CS	6SB2G8	54	72.88	1.5	2.05818	F
B	CS	6SB2G9	58	83.51	2.24	2.68231	M
B	CS	6SB2G10	51	60.42	1.39	2.30056	F
A	US	6SA1G11	44	41.37	0.65	1.57119	M
A	US	6SA1M2	45	43.69	0.76	1.73953	F
A	US	6SA1M3	42	30.25	0.32	1.05785	M
A	US	6SA1M4	45	43.72	0.34	0.777676	M
A	US	6SA1M5	41	32.73	0.25	0.763825	F
A	US	6SA2M1	47	48.49	0.52	1.07239	M
A	US	6SA2M2	46	42.26	0.7	1.65641	F
A	US	6SA2M3	45	34.39	0.41	1.19221	F
A	US	6SA2M4	42	32.68	0.73	2.23378	F
B	US	6SA2M5	42	35.24	0.27	0.766175	F
B	US	6SB1M1	44	33.12	0.33	0.996377	M
B	US	6SB1M2	41	28.73	1.81	6.30003	M
B	US	6SB1M3	43	32.57	0.15	0.460547	nd
B	US	6SB1M4	44	31.23	0.24	0.768492	M
B	US	6SB1M5	43	40.37	0.39	0.966064	F
B	US	6SB2M1	49	49.21	0.55	1.11766	F
B	US	6SB2M2	45	35.58	0.26	0.730748	F
B	US	6SB2M3	44	33.84	0.52	1.53664	F
B	US	6SB2M4	48	44.93	0.86	1.91409	F
B	US	6SB2M5	45	36.67	0.58	1.58167	M
A	Small-US	6SA1P1	36	22.26	0.24	1.07817	M
A	Small-US	6SA1P2	31	14.33	na	0	nd
A	Small-US	6SA1P3	31	15.07	na	0	nd
A	Small-US	6SA1P4	36	18.96	0.07	0.369198	nd
A	Small-US	6SA1P5	33	14.38	na	0	nd
A	Small-US	6SA2P1	34	19.52	na	0	nd
A	Small-US	6SA2P2	37	21.29	na	0	nd
A	Small-US	6SA2P3	34	16.87	na	0	nd
A	Small-US	6SA2P4	36	17.3	na	0	nd
A	Small-US	6SA2P5	33	13.83	na	0	nd
B	Small-US	6SB1P1	31	12.39	na	0	nd
B	Small-US	6SB1P2	39	23.62	0.17	0.719729	nd
B	Small-US	6SB1P3	36	18.87	0.1	0.529942	nd
B	Small-US	6SB1P4	37	20.88	0.14	0.670498	nd
B	Small-US	6SB1P5	36	20.69	0.04	0.19333	nd
B	Small-US	6SB2P1	31	13.83	na	0	nd
B	Small-US	6SB2P2	32	16.07	na	0	nd
B	Small-US	6SB2P3	34	21.64	na	0	nd
B	Small-US	6SB2P4	32	18.47	na	0	nd
B	Small-US	6SB2P5	32	18.99	na	0	nd
A	CS	7SA1G1	52	58.4	1.73	2.96233	f
A	CS	7SA1G2	53	58.32	0.98	1.68038	f
A	CS	7SA1G3	54	57.32	1.7	2.96581	f
A	CS	7SA1G4	52	51.25	0.89	1.73659	f
A	CS	7SA1G5	54	70.5	0.76	1.07801	f
A	CS	7SA1G6	55	62.69	1.38	2.20131	f
A	CS	7SA1G7	50	61.38	1.52	2.47638	m
A	CS	7SA1G8	51	61.11	1.72	2.8146	f
A	CS	7SA1G9	52	51.5	0.79	1.53398	f
A	CS	7SA1G10	51	44.72	0.39	0.872093	f
A	CS	7SA2G1	52	57.11	1.8	3.15181	m
A	CS	7SA2G2	58	67.43	2.07	3.06985	f
A	CS	7SA2G3	55	70.45	2.21	3.13698	f
A	CS	7SA2G4	55	66.45	1.59	2.39278	f
A	CS	7SA2G5	51	61.79	1.19	1.92588	f
A	CS	7SA2G6	56	69.51	2.02	2.90606	f
A	CS	7SA2G7	56	67.74	1.2	1.77148	f
A	CS	7SA2G8	54	66.81	0.69	1.03278	m
A	CS	7SA2G9	55	68.81	1.45	2.10725	f
A	CS	7SA2G10	58	82.07	1.98	2.41257	nd
B	CS	7SB1G1	55	68.79	2.16	3.13999	m
B	CS	7SB1G2	57	79.25	1.09	1.37539	f
B	CS	7SB1G3	53	65.72	2.87	4.36701	m
B	CS	7SB1G4	54	78.66	1.81	2.30104	f
B	CS	7SB1G5	52	66.1	1.78	2.69289	f
B	CS	7SB1G6	53	78.45	0.93	1.18547	m
B	CS	7SB1G7	50	60.84	1.35	2.21893	f
B	CS	7SB1G8	51	62.16	1	1.60875	f
B	CS	7SB1G9	54	70.08	1.95	2.78253	f
B	CS	7SB1G10	50	60.98	1.79	2.93539	f
B	CS	7SB2G1	53	59.85	2.33	3.89307	m
B	CS	7SB2G2	55	77.74	1.63	2.09673	f
B	CS	7SB2G3	54	62.63	1.14	1.82021	f
B	CS	7SB2G4	55	65.09	1.8	2.7654	f
B	CS	7SB2G5	55	61.26	1.99	3.24845	f
B	CS	7SB2G6	53	57.13	2.12	3.71083	f
B	CS	7SB2G7	53	67.67	1.07	1.5812	f
B	CS	7SB2G8	54	69.76	2.28	3.26835	f
B	CS	7SB2G9	53	64.8	1.46	2.25309	f
B	CS	7SB2G10	51	60.04	1.33	2.21519	f
A	US	7SA1M1	47	42.03	0.73	1.73685	m
A	US	7SA1M2	44	35.84	0.89	2.48326	f
A	US	7SA1M3	47	39.68	0.94	2.36895	f
A	US	7SA1M4	43	39.94	0.62	1.55233	m
A	US	7SA1M5	43	30.98	0.38	1.2266	nd
A	US	7SA2M1	46	40.32	0.82	2.03373	m
A	US	7SA2M2	45	36.33	0.38	1.04597	m
A	US	7SA2M3	48	45.53	0.68	1.49352	m
A	US	7SA2M4	45	48.28	0.53	1.09776	f
A	US	7SA2M5	48	50.93	1.22	2.39544	f
B	US	7SB1M1	40	26.39	0.86	3.25881	f
B	US	7SB1M2	45	41.39	0.87	2.10196	f
B	US	7SB1M3	42	28.71	0.5	1.74155	f
B	US	7SB1M4	40	27.86	0.24	0.86145	m
B	US	7SB1M5	40	31.24	0.27	0.864277	f
B	US	7SB2M1	49	54.17	1.11	2.0491	f
B	US	7SB2M2	49	51.7	1.15	2.22437	f
B	US	7SB2M3	49	49.38	0.57	1.15431	f
B	US	7SB2M4	44	35.42	0.76	2.14568	f
B	US	7SB2M5	46	39.17	0.56	1.42967	m
A	Small-US	7SA1P1	33	na	na	0	nd
A	Small-US	7SA1P2	34	16.1	na	0	nd
A	Small-US	7SA1P3	34	19.7	0.26	1.3198	nd
A	Small-US	7SA1P4	32	14.59	na	0	nd
A	Small-US	7SA1P5	37	24.07	0.18	0.747819	nd
A	Small-US	7SA2P1	35	18.46	na	0	nd
A	Small-US	7SA2P2	36	19.35	na	0	nd
A	Small-US	7SA2P3	35	17.77	na	0	nd
A	Small-US	7SA2P4	37	26.42	0.1	0.378501	nd
A	Small-US	7SA2P5	34	16.13	na	0	nd
B	Small-US	7SB1P1	36	24.24	0.18	0.742574	nd
B	Small-US	7SB1P2	34	18.15	0.18	0.991736	nd
B	Small-US	7SB1P3	33	17.45	na	0	nd
B	Small-US	7SB1P4	31	17.07	na	0	nd
B	Small-US	7SB1P5	30	15.91	na	0	nd
B	Small-US	7SB2P1	36	19.31	0.08	0.414293	nd
B	Small-US	7SB2P2	37	22.8	0.11	0.482456	nd
B	Small-US	7SB2P3	36	20.3	0.31	1.52709	nd
B	Small-US	7SB2P4	39	21.73	0.1	0.460193	nd
B	Small-US	7SB2P5	38	20.5	0.19	0.926829	nd
A	CS	8SA1G1	56	68.65	1.1	1.60233	m
A	CS	8SA1G2	55	67.31	0.8	1.18853	f
A	CS	8SA1G3	57	71.17	1.16	1.6299	f
A	CS	8SA1G4	57	69.54	1.17	1.68248	f
A	CS	8SA1G5	54	59.34	0.84	1.41557	f
A	CS	8SA1G6	55	62.42	1.19	1.90644	f
A	CS	8SA1G7	54	62.05	0.47	0.757454	f
A	CS	8SA1G8	54	69.76	1.45	2.07856	f
A	CS	8SA1G9	54	74.13	0.98	1.322	f
A	CS	8SA1G10	55	65.6	1.14	1.7378	m
A	CS	8SA2G1	54	67.18	0.4	0.595415	f
A	CS	8SA2G2	54	69.66	1.05	1.50732	f
A	CS	8SA2G3	57	81.97	1.62	1.97633	m
A	CS	8SA2G4	56	73.97	0.86	1.16263	m
A	CS	8SA2G5	53	63.35	0.45	0.710339	m
A	CS	8SA2G6	54	65.37	0.96	1.46856	m
A	CS	8SA2G7	51	52.06	2.39	4.59086	f
A	CS	8SA2G8	52	55.52	0.79	1.42291	f
A	CS	8SA2G9	53	58.2	0.47	0.80756	f
A	CS	8SA2G10	53	64.84	1.5	2.31339	m
B	CS	8SB1G1	60	97.04	3.3	3.40066	f
B	CS	8SB1G2	59	78.78	3.41	4.32851	f
B	CS	8SB1G3	54	66.56	1.89	2.83954	f
B	CS	8SB1G4	54	78.04	1.44	1.84521	f
B	CS	8SB1G5	60	90.07	3.16	3.50838	m
B	CS	8SB1G6	53	73.99	2.51	3.39235	f
B	CS	8SB1G7	54	61.58	1.85	3.00422	f
B	CS	8SB1G8	54	73.27	1.42	1.93804	f
B	CS	8SB1G9	53	69.59	1.06	1.52321	f
B	CS	8SB1G10	56	87.32	1.6	1.83234	f
B	CS	8SB2G1	52	63.61	1.73	2.7197	m
B	CS	8SB2G2	51	57.82	2	3.45901	f
B	CS	8SB2G3	52	66.02	1.45	2.1963	f
B	CS	8SB2G4	52	55.49	1.77	3.18976	m
B	CS	8SB2G5	53	39.46	1.17	2.96503	m
B	CS	8SB2G6	52	66.35	1.68	2.53203	f
B	CS	8SB2G7	59	86.66	1.74	2.00785	f
B	CS	8SB2G8	52	59.97	1.65	2.75138	m
B	CS	8SB2G9	54	69.4	2.11	3.04035	f
B	CS	8SB2G10	55	61.98	1.6	2.58148	f
A	US	8SA1M1	47	38.21	0.65	1.70113	f
A	US	8SA1M2	43	34.15	0.15	0.439239	nd
A	US	8SA1M3	42	32.25	0.12	0.372093	f
A	US	8SA1M4	44	36.3	0.2	0.550964	f
A	US	8SA1M5	44	35.81	0.2	0.558503	m
A	US	8SA2M1	48	50.33	0.52	1.03318	f
A	US	8SA2M2	48	47.33	0.59	1.24657	m
A	US	8SA2M3	44	42.3	0.45	1.06383	f
A	US	8SA2M4	45	39.84	0.48	1.20482	m
A	US	8SA2M5	42	30.91	0.1	0.32352	m
B	US	8SB1M1	45	43.32	0.58	1.33887	f
B	US	8SB1M2	46	45.02	0.6	1.33274	f
B	US	8SB1M3	46	49.89	0.94	1.88415	m
B	US	8SB1M4	45	45.84	0.91	1.98517	f
B	US	8SB1M5	47	59.04	1.07	1.81233	f
B	US	8SB2M1	42	37.48	0.57	1.52081	m
B	US	8SB2M2	45	39.05	na	0	nd
B	US	8SB2M3	45	41.22	0.96	2.32897	f
B	US	8SB2M4	44	43.47	0.34	0.782149	m
B	US	8SB2M5	47	43.43	0.57	1.31246	m
A	Small-US	8SA1P1	31	13	na	0	nd
A	Small-US	8SA1P2	33	15.59	0.05	0.320718	nd
A	Small-US	8SA1P3	35	19.66	0.07	0.356053	nd
A	Small-US	8SA1P4	38	23.07	na	0	nd
A	Small-US	8SA1P5	34	16.36	0.18	1.10024	nd
A	Small-US	8SA2P1	32	13.85	na	0	nd
A	Small-US	8SA2P2	35	19.61	na	0	nd
A	Small-US	8SA2P3	39	26.26	0.08	0.304646	nd
A	Small-US	8SA2P4	38	22.37	0.24	1.07287	nd
A	Small-US	8SA2P5	39	23.97	na	0	nd
B	Small-US	8SB1P1	34	20.35	na	0	nd
B	Small-US	8SB1P2	31	13.34	na	0	nd
B	Small-US	8SB1P3	36	23.49	na	0	nd
B	Small-US	8SB1P4	30	11.99	na	0	nd
B	Small-US	8SB1P5	36	26.5	na	0	nd
B	Small-US	8SB2P1	36	22.81	0.14	0.613766	nd
B	Small-US	8SB2P2	36	22.89	0.11	0.480559	nd
B	Small-US	8SB2P3	34	19.62	0.05	0.254842	nd
B	Small-US	8SB2P4	37	22.65	0.22	0.971302	nd
B	Small-US	8SB2P5	37	21.6	0.14	0.648148	nd
A	CS	9SA1G1	57	65.15	1.81	2.7782	m
A	CS	9SA1G2	57	74.53	1.51	2.02603	m
A	CS	9SA1G3	55	63.02	1.62	2.57061	m
A	CS	9SA1G4	57	67.06	1.89	2.81837	f
A	CS	9SA1G5	57	66.85	1.4	2.09424	f
A	CS	9SA1G6	52	51.7	1.09	2.10832	m
A	CS	9SA1G7	54	61.3	1.35	2.20228	m
A	CS	9SA1G8	53	55.07	1	1.81587	f
A	CS	9SA1G9	53	58.68	1.6	2.72665	m
A	CS	9SA1G10	53	55.4	0.98	1.76895	f
A	CS	9SA2G1	57	68.41	1.84	2.68967	m
A	CS	9SA2G2	57	67.14	2.26	3.3661	f
A	CS	9SA2G3	56	71.32	2.04	2.86035	nd
A	CS	9SA2G4	55	47.33	1.34	2.83119	f
A	CS	9SA2G5	60	83.63	0.84	1.00442	m
A	CS	9SA2G6	60	65.65	1.02	1.55369	f
A	CS	9SA2G7	56	72.39	2.32	3.20486	f
A	CS	9SA2G8	55	65.73	2.1	3.19489	f
A	CS	9SA2G9	56	70.33	1.4	1.99062	m
A	CS	9SA2G10	51	47.44	0.86	1.81282	m
B	CS	9SB1G1	53	61.49	3.12	5.074	m
B	CS	9SB1G2	56	66.57	1.38	2.07301	m
B	CS	9SB1G3	54	67.97	2.14	3.14845	f
B	CS	9SB1G4	57	71.32	2.65	3.71565	f
B	CS	9SB1G5	55	60.6	2.28	3.76238	f
B	CS	9SB1G6	56	64.19	2.19	3.41175	f
B	CS	9SB1G7	61	76.93	1.14	1.48187	f
B	CS	9SB1G8	54	66.66	2.15	3.22532	f
B	CS	9SB1G9	53	69.24	1.7	2.45523	f
B	CS	9SB1G10	51	52.95	1.9	3.58829	f
B	CS	9SB2G1	52	63.22	1.23	1.94559	m
B	CS	9SB2G2	50	55.33	1.81	3.27128	f
B	CS	9SB2G3	50	56.44	1.4	2.48051	f
B	CS	9SB2G4	52	58.48	2.14	3.65937	f
B	CS	9SB2G5	52	53.23	1.54	2.89311	m
B	CS	9SB2G6	51	50.35	1.88	3.73386	f
B	CS	9SB2G7	55	68.84	1.11	1.61243	f
B	CS	9SB2G8	55	44.7	5.3	11.8568	f
B	CS	9SB2G9	51	50.62	1.86	3.67444	f
B	CS	9SB2G10	51	64.34	2.17	3.37271	m
A	US	9SA1M1	46	40.78	0.5	1.22609	m
A	US	9SA1M2	46	46.34	0.46	0.992663	m
A	US	9SA1M3	45	29.79	1.93	6.47868	m
A	US	9SA1M4	49	49.77	0.9	1.80832	m
A	US	9SA1M5	49	49.32	1.86	3.77129	m
A	US	9SA2M1	45	36.04	0.42	1.16537	f
A	US	9SA2M2	42	27.42	0.21	0.765864	m
A	US	9SA2M3	45	36.64	0.39	1.06441	f
A	US	9SA2M4	46	37.91	1.08	2.84885	f
A	US	9SA2M5	46	38.55	0.85	2.20493	m
B	US	9SB1M1	42	31.46	0.88	2.7972	f
B	US	9SB1M2	49	49.15	2.34	4.76094	f
B	US	9SB1M3	42	32.42	0.48	1.48057	f
B	US	9SB1M4	42	32.35	0.81	2.50386	f
B	US	9SB1M5	42	33.22	1.3	3.91331	m
B	US	9SB2M1	46	43.49	1.45	3.3341	f
B	US	9SB2M2	47	45.81	1.05	2.29208	f
B	US	9SB2M3	46	32.21	1.01	3.13567	m
B	US	9SB2M4	44	39.74	0.94	2.36537	m
B	US	9SB2M5	47	47.5	1.6	3.36842	f
A	Small-US	9SA1P1	33	17.2	na	0	nd
A	Small-US	9SA1P2	33	12.68	na	0	nd
A	Small-US	9SA1P3	35	16.04	na	0	nd
A	Small-US	9SA1P4	34	18.94	na	0	nd
A	Small-US	9SA1P5	38	21.31	na	0	nd
A	Small-US	9SA2P1	38	22.4	na	0	nd
A	Small-US	9SA2P2	34	16.08	na	0	nd
A	Small-US	9SA2P3	38	23.62	0.21	0.889077	nd
A	Small-US	9SA2P4	39	27.91	0.08	0.286636	nd
A	Small-US	9SA2P5	38	26.03	0.04	0.153669	nd
B	Small-US	9SB1P1	33	14.93	na	0	nd
B	Small-US	9SB1P2	39	27.9	0.29	1.03943	f
B	Small-US	9SB1P3	38	21.9	0.33	1.50685	m
B	Small-US	9SB1P4	36	19.53	0.16	0.819252	nd
B	Small-US	9SB1P5	36	19.8	0.24	1.21212	m
B	Small-US	9SB2P1	39	22.72	0.44	1.93662	f
B	Small-US	9SB2P2	36	24.42	0.26	1.0647	m
B	Small-US	9SB2P3	33	17.03	na	0	nd
B	Small-US	9SB2P4	35	20.45	0.21	1.02689	nd
B	Small-US	9SB2P5	35	17.61	0.18	1.02215	nd
A	CS	10SA1G1	59	82.74	1.53	1.84917	m
A	CS	10SA1G2	57	68.13	1.45	2.12828	m
A	CS	10SA1G3	59	76.61	1.33	1.73607	f
A	CS	10SA1G4	59	74.21	0.52	0.700714	nd
A	CS	10SA1G5	60	77.55	1.17	1.5087	f
A	CS	10SA1G6	60	67.09	1.51	2.25071	m
A	CS	10SA1G7	60	67.04	1.82	2.7148	m
A	CS	10SA1G8	54	61.81	1.5	2.42679	f
A	CS	10SA1G9	56	62.28	0.55	0.883109	f
A	CS	10SA1G10	57	81.01	1.17	1.44427	f
A	CS	10SA2G1	54	64.88	1.2	1.84957	m
A	CS	10SA2G2	56	62.08	2.14	3.44716	m
A	CS	10SA2G3	51	49.36	1.01	2.04619	m
A	CS	10SA2G4	51	56	1.33	2.375	f
A	CS	10SA2G5	54	63.46	1.07	1.6861	m
A	CS	10SA2G6	52	58	0.51	0.87931	f
A	CS	10SA2G7	53	64.33	1.73	2.68926	m
A	CS	10SA2G8	57	74.17	2.04	2.75044	m
A	CS	10SA2G9	58	65.58	1.02	1.55535	m
B	CS	10SA2G10	58	69.87	2.14	3.06283	m
B	CS	10SB1G1	56	76.09	2.86	3.75871	f
B	CS	10SB1G2	53	65.02	1.5	2.30698	f
B	CS	10SB1G3	52	70.83	1.66	2.34364	f
B	CS	10SB1G4	52	65.01	1.92	2.95339	f
B	CS	10SB1G5	51	65.3	2.17	3.32312	m
B	CS	10SB1G6	54	67.2	2.58	3.83929	m
B	CS	10SB1G7	56	70.82	3.06	4.32081	m
B	CS	10SB1G8	51	61.15	1.7	2.78005	m
B	CS	10SB1G9	53	70.44	1.7	2.4134	m
B	CS	10SB1G10	54	77.46	2.54	3.27911	f
B	CS	10SB2G1	51	59.88	2.56	4.27522	m
B	CS	10SB2G2	60	91.57	2.2	2.40253	f
B	CS	10SB2G3	53	70.23	0.73	1.03944	f
B	CS	10SB2G4	54	70.23	3.17	4.51374	f
B	CS	10SB2G5	56	76.26	1.51	1.98007	f
B	CS	10SB2G6	52	71.29	1.76	2.46879	m
B	CS	10SB2G7	53	62.08	1.59	2.56121	f
B	CS	10SB2G8	51	56.7	3.06	5.39683	m
B	CS	10SB2G9	55	72.82	1.66	2.27959	f
B	CS	10SB2G10	54	65.44	1.58	2.41443	f
A	US	10SA1M1	43	31.32	0.71	2.26692	m
A	US	10SA1M2	46	39.85	0.7	1.75659	m
A	US	10SA1M3	48	41.46	0.7	1.68837	m
A	US	10SA1M4	49	49.15	1.48	3.01119	m
A	US	10SA1M5	48	40.58	0.27	0.665352	m
A	US	10SA2M1	49	46.38	0.7	1.50927	m
A	US	10SA2M2	46	36.32	0.36	0.991189	m
A	US	10SA2M3	49	47.29	0.53	1.12074	f
A	US	10SA2M4	48	43.41	1.22	2.81041	m
A	US	10SA2M5	45	42.19	1.19	2.82057	f
B	US	10SB1M1	49	44.38	1.57	3.53763	m
B	US	10SB1M2	47	32.65	0.98	3.00153	f
B	US	10SB1M3	47	38.09	1.02	2.67787	f
B	US	10SB1M4	49	48.87	1.29	2.63966	m
B	US	10SB1M5	43	39.39	1.07	2.71643	m
B	US	10SB2M1	42	37.03	0.59	1.5933	f
B	US	10SB2M2	49	45.91	0.75	1.63363	m
B	US	10SB2M3	47	50.06	1.48	2.95645	f
B	US	10SB2M4	46	42.02	0.33	0.78534	f
B	US	10SB2M5	46	27.9	0.35	1.25448	m
A	Small-US	10SA1P1	39	23.19	na	0	nd
A	Small-US	10SA1P2	38	18.43	na	0	nd
A	Small-US	10SA1P3	36	21.17	na	0	nd
A	Small-US	10SA1P4	37	22.66	na	0	nd
A	Small-US	10SA2P1	34	18.27	na	0	nd
A	Small-US	10SA2P2	32	15.98	na	0	nd
A	Small-US	10SA2P3	35	19.95	na	0	nd
A	Small-US	10SA2P4	33	15.04	na	0	nd
A	Small-US	10SA2P5	34	16.68	na	0	nd
B	Small-US	10SB1P1	39	25.47	0.16	0.62819	nd
B	Small-US	10SB1P2	37	23.57	0.31	1.31523	nd
B	Small-US	10SB1P3	35	20.85	0.45	2.15827	m
B	Small-US	10SB1P4	33	16.99	0.18	1.05945	nd
B	Small-US	10SB1P5	32	15.13	0.05	0.330469	nd
B	Small-US	10SB2P1	37	24.52	1.12	4.5677	m
B	Small-US	10SB2P2	37	24.64	0.83	3.36851	f
B	Small-US	10SB2P3	33	15.3	0.11	0.718954	m
B	Small-US	10SB2P4	31	15.62	0.12	0.768246	f
B	Small-US	10SB2P5	31	14.63	0.02	0.136705	f
A	CS	12SA1G1	54	61.33	2.4	3.91326	m
A	CS	12SA1G2	55	65.21	2.98	4.56985	m
A	CS	12SA1G3	57	66.46	3.16	4.75474	m
A	CS	12SA1G4	50	53.74	1.83	3.40528	m
A	CS	12SA1G5	54	53.26	1.82	3.4172	m
A	CS	12SA1G6	54	57.99	1.54	2.65563	f
A	CS	12SA1G7	53	62.91	2.15	3.41758	m
A	CS	12SA1G8	61	62.18	0.77	1.23834	f
A	CS	12SA1G9	61	73.89	3.11	4.20896	m
A	CS	12SA1G10	55	68.13	2.89	4.24189	m
A	CS	12SA2G1	54	69.24	2.25	3.24957	f
A	CS	12SA2G2	54	61.39	1.59	2.59	f
A	CS	12SA2G3	50	54.98	1.11	2.01892	m
A	CS	12SA2G4	51	63.6	1.7	2.67296	nd
A	CS	12SA2G5	53	64.59	1.97	3.05001	nd
A	CS	12SA2G6	54	61.73	1.97	3.19132	f
A	CS	12SA2G7	54	58.01	1.95	3.36149	f
A	CS	12SA2G8	54	60.01	2.18	3.63273	m
A	CS	12SA2G9	52	64.64	1.42	2.19678	m
A	CS	12SA2G10	50	48.5	1.21	2.49485	m
B	CS	12SB1G1	54	64.33	2.13	3.31105	f
B	CS	12SB1G2	53	73.83	5.21	7.05675	f
B	CS	12SB1G3	59	90.19	3.64	4.03592	m
B	CS	12SB1G4	51	61.31	3.97	6.47529	f
B	CS	12SB1G5	57	77.71	4.59	5.90658	m
B	CS	12SB1G6	56	76.45	2.61	3.414	f
B	CS	12SB1G7	51	57.97	2.8	4.83008	nd
B	CS	12SB1G8	54	70.23	4.34	6.1797	f
B	CS	12SB1G9	54	75.97	1.77	2.32987	nd
B	CS	12SB1G10	54	67.36	2.83	4.20131	nd
B	CS	12SB2G1	52	66.81	3.81	5.70274	m
B	CS	12SB2G2	56	75.19	3.6	4.78787	f
B	CS	12SB2G3	54	76.19	3.01	3.95065	nd
B	CS	12SB2G4	52	61.35	1.42	2.31459	nd
B	CS	12SB2G5	50	58.63	3.06	5.21917	m
B	CS	12SB2G6	51	58.6	2.81	4.79522	f
B	CS	12SB2G7	54	75.06	1.97	2.62457	f
B	CS	12SB2G8	53	75.73	2.08	2.7466	nd
B	CS	12SB2G9	59	79.25	2.56	3.23028	m
B	CS	12SB2G10	50	57.23	3.04	5.3119	f
A	US	12SA1M1	42	26.22	0.15	0.572082	nd
A	US	12SA1M2	47	40.67	2.13	5.23728	m
A	US	12SA1M3	45	37.7	0.8	2.12202	nd
A	US	12SA1M4	48	45.79	1.35	2.94824	m
A	US	12SA1M5	49	41.54	0.25	0.60183	nd
A	US	12SA2M1	45	36.56	1.27	3.47374	f
A	US	12SA2M2	46	43.42	1.38	3.17826	m
A	US	12SA2M3	45	35.05	0.77	2.19686	m
A	US	12SA2M4	44	42.11	1.13	2.68345	nd
A	US	12SA2M5	44	27.83	na	0	nd
B	US	12SB1M1	48	47.31	2.34	4.9461	f
B	US	12SB1M2	47	50.1	1.85	3.69261	f
B	US	12SB1M3	43	35.93	1.65	4.59226	f
B	US	12SB1M4	41	33.11	0.78	2.35578	m
B	US	12SB1M5	45	43.81	0.78	1.78042	m
B	US	12SB2M1	45	35.55	0.69	1.94093	nd
B	US	12SB2M2	43	39.85	0.63	1.58093	m
B	US	12SB2M3	47	50.97	1.12	2.19737	m
B	US	12SB2M4	45	35.43	0.58	1.63703	m
B	US	12SB2M5	43	41.22	2.76	6.69578	f
A	Small-US	12SA1P1	37	20.29	na	0	nd
A	Small-US	12SA1P2	36	20.96	na	0	nd
A	Small-US	12SA1P3	39	28.79	0.64	2.22299	nd
A	Small-US	12SA1P4	33	15.41	na	0	nd
A	Small-US	12SA1P5	36	23.15	0.38	1.64147	nd
A	Small-US	12SA2P1	39	23.76	na	0	nd
A	Small-US	12SA2P2	39	24.7	na	0	nd
A	Small-US	12SA2P3	39	23.63	0.37	1.56581	nd
A	Small-US	12SA2P4	39	24.08	0.14	0.581395	nd
B	Small-US	12SB1P1	37	27.23	0.53	1.94638	nd
B	Small-US	12SB1P2	38	26.78	0.23	0.85885	nd
B	Small-US	12SB1P3	39	26.42	0.48	1.81681	nd
B	Small-US	12SB1P4	37	22.18	0.08	0.360685	nd
B	Small-US	12SB1P5	33	18.6	0.39	2.09677	nd
B	Small-US	12SB2P1	32	15.69	na	0	nd
B	Small-US	12SB2P2	35	23.09	0.58	2.51191	nd
B	Small-US	12SB2P3	33	17.1	0.1	0.584795	nd
B	Small-US	12SB2P4	32	18.27	0.21	1.14943	nd
B	Small-US	12SB2P5	34	18.18	na	0	nd
A	CS	01SA1G1	57	73.94	3.1	4.19259	f
A	CS	01SA1G2	60	78.3	3.87	4.94253	f
A	CS	01SA1G3	58	57.29	2.09	3.64811	m
A	CS	01SA1G4	57	58.72	1.11	1.89033	f
A	CS	01SA1G5	59	66.9	5.38	8.04185	f
A	CS	01SA1G6	52	55.15	2.43	4.40617	f
A	CS	01SA1G7	59	76.93	3.25	4.22462	m
A	CS	01SA1G8	58	73.94	1.74	2.35326	m
A	CS	01SA1G9	57	72.87	4.63	6.35378	m
A	CS	01SA1G10	58	61.7	3.38	5.47812	f
A	CS	01SA2G1	53	59.74	3.35	5.60763	m
A	CS	01SA2G2	55	60.59	3.95	6.51923	m
A	CS	01SA2G3	59	73.18	4.36	5.95791	f
A	CS	01SA2G4	55	69.95	2.48	3.54539	f
A	CS	01SA2G5	55	64.29	3.23	5.02411	f
A	CS	01SA2G6	58	70.06	3.88	5.53811	f
A	CS	01SA2G7	54	62.25	4.91	7.88755	f
A	CS	01SA2G8	54	58.55	1.39	2.37404	m
A	CS	01SA2G9	60	73.89	2.95	3.99242	f
A	CS	01SA2G10	52	58.98	1.95	3.30621	m
B	CS	01SB1G1	50	57.23	1.93	3.37236	m
B	CS	01SB1G2	55	72.94	4.84	6.63559	f
B	CS	01SB1G3	58	83.32	5.47	6.56505	f
B	CS	01SB1G4	53	65.61	2.9	4.42006	m
B	CS	01SB1G5	55	64.49	4.4	6.82276	m
B	CS	01SB1G6	55	66.72	3.52	5.27578	f
B	CS	01SB1G7	53	71.76	2.55	3.55351	m
B	CS	01SB1G8	54	68.93	2.64	3.82997	f
B	CS	01SB1G9	56	85.64	1.78	2.07847	f
B	CS	01SB1G10	56	71.41	3.27	4.57919	f
B	CS	01SB2G1	57	72.97	5.74	7.86625	f
B	CS	01SB2G2	58	61.86	3.24	5.23763	m
B	CS	01SB2G3	50	61.59	1.99	3.23104	m
B	CS	01SB2G4	50	55.88	3.37	6.03078	f
B	CS	01SB2G5	51	60.72	3.8	6.25823	nd
B	CS	01SB2G6	58	71.87	6.68	9.29456	f
B	CS	01SB2G7	52	61.95	2.09	3.37369	nd
B	CS	01SB2G8	53	67.16	2.35	3.49911	m
B	CS	01SB2G9	50	58.49	2.54	4.34262	m
B	CS	01SB2G10	53	60.53	3.61	5.96398	m
A	US	01SA1M1	42	28.51	0.33	1.15749	m
A	US	01SA1M2	48	48.16	1.29	2.67857	m
A	US	01SA1M3	44	33.35	0.79	2.36882	m
A	US	01SA1M4	42	31.08	0.32	1.0296	m
A	US	01SA1M5	49	43.5	1.22	2.8046	m
A	US	01SA2M1	45	41.1	0.7	1.70316	m
A	US	01SA2M2	45	43.81	1.44	3.28692	m
A	US	01SA2M3	46	39.35	2.25	5.71792	m
A	US	01SA2M4	43	33.8	1.05	3.10651	f
A	US	01SA2M5	41	24.69	0.59	2.38963	f
B	US	01SB1M1	48	40.88	2.51	6.13992	f
B	US	01SB1M2	45	39.29	0.97	2.46882	m
B	US	01SB1M3	45	40.6	0.91	2.24138	m
B	US	01SB1M4	43	38	0.86	2.26316	nd
B	US	01SB1M5	44	38.71	0.38	0.981658	nd
B	US	01SB2M1	44	34.3	1.11	3.23615	f
B	US	01SB2M2	41	31.75	na	0	nd
B	US	01SB2M3	43	31.14	1.76	5.65189	m
B	US	01SB2M4	42	30.82	1.48	4.80208	f
B	US	01SB2M5	47	46.21	3.32	7.18459	f
A	Small-US	01SA1P1	37	27.62	0.16	0.57929	nd
A	Small-US	01SA1P2	39	26.77	na	0	nd
A	Small-US	01SA1P3	36	20	na	0	nd
A	Small-US	01SA1P4	37	20.65	na	0	nd
A	Small-US	01SA1P5	38	21.06	na	0	nd
A	Small-US	01SA2P1	37	24.06	na	0	nd
A	Small-US	01SA2P2	37	17.71	na	0	nd
A	Small-US	01SA2P3	32	15.56	na	0	nd
A	Small-US	01SA2P4	32	13.38	na	0	nd
A	Small-US	01SA2P5	35	17.55	na	0	nd
B	Small-US	01SB1P1	35	16.85	na	0	nd
B	Small-US	01SB1P2	37	21.24	0.82	3.86064	m
B	Small-US	01SB1P3	33	13.14	na	0	nd
B	Small-US	01SB1P4	36	20.41	0.45	2.2048	m
B	Small-US	01SB1P5	33	14.48	na	0	nd
B	Small-US	01SB2P1	34	19.15	na	0	nd
B	Small-US	01SB2P2	34	20.3	na	0	nd
B	Small-US	01SB2P3	33	18.63	na	0	nd
B	Small-US	01SB2P4	37	25.65	na	0	nd
B	Small-US	01SB2P5	33	17.18	na	0	nd
A	CS	02SA1G1	55	69.82	2.08	2.97909	f
A	CS	02SA1G2	61	79.77	5.49	6.88229	f
A	CS	02SA1G3	56	65.39	3.41	5.21486	m
A	CS	02SA1G4	56	72.17	6.63	9.18664	f
A	CS	02SA1G5	54	67.89	4.74	6.98188	f
A	CS	02SA1G6	54	61.75	3.1	5.02024	f
A	CS	02SA1G7	54	66.62	3.85	5.77905	f
A	CS	02SA1G8	53	56.66	3.16	5.57713	m
A	CS	02SA1G9	53	58.02	1.46	2.51637	m
A	CS	02SA1G10	59	66.84	4.1	6.13405	f
A	CS	02SA2G1	54	61.04	4.77	7.81455	f
A	CS	02SA2G2	56	68.05	5.08	7.4651	m
A	CS	02SA2G3	55	74.18	3.23	4.35427	f
A	CS	02SA2G4	53	56.52	3.68	6.51097	f
A	CS	02SA2G5	51	58.76	2.17	3.69299	m
A	CS	02SA2G6	50	54.14	1.97	3.63871	f
A	CS	02SA2G7	55	65.43	4.32	6.60248	f
A	CS	02SA2G8	54	61.62	1.67	2.71016	m
A	CS	02SA2G9	56	68.68	3.27	4.76121	f
A	CS	02SA2G10	52	62.26	1.83	2.93929	m
B	CS	02SB1G1	53	69.2	3.42	4.9422	m
B	CS	02SB1G2	56	77.67	3.42	4.40324	m
B	CS	02SB1G3	52	70.6	3.7	5.24079	f
B	CS	02SB1G4	51	61.39	3.28	5.34289	f
B	CS	02SB1G5	51	66.46	3.96	5.95847	m
B	CS	02SB1G6	53	62.79	1.7	2.70744	m
B	CS	02SB1G7	51	67.15	4.51	6.71631	m
B	CS	02SB1G8	55	78.98	4.18	5.29248	f
B	CS	02SB1G9	51	62.86	4.63	7.36557	f
B	CS	02SB1G10	54	76.86	3.65	4.74889	m
B	CS	02SB2G1	52	65.81	2.88	4.37623	f
B	CS	02SB2G2	51	50.34	3.3	6.55542	f
B	CS	02SB2G3	61	99.97	6.12	6.12184	m
B	CS	02SB2G4	54	70.15	6.15	8.76693	m
B	CS	02SB2G5	52	69	5.96	8.63768	f
B	CS	02SB2G6	53	73.22	3.08	4.2065	m
B	CS	02SB2G7	52	69.47	3.67	5.28286	m
B	CS	02SB2G8	54	61.11	3.61	5.90738	m
B	CS	02SB2G9	50	56.06	4.7	8.38387	f
B	CS	02SB2G10	51	56.89	4.12	7.24205	f
A	US	02SA1M1	41	25.09	0.26	1.03627	m
A	US	02SA1M2	48	42.46	1.83	4.30994	f
A	US	02SA1M3	44	33.31	0.91	2.73191	m
A	US	02SA1M4	47	38.3	0.98	2.55875	f
A	US	02SA1M5	48	36.93	1.22	3.30355	f
A	US	02SA2M1	43	38.55	0.4	1.03761	m
A	US	02SA2M2	44	45.46	1.35	2.96964	f
A	US	02SA2M3	43	28.63	0.75	2.61963	m
A	US	02SA2M4	48	42.23	1.99	4.71229	f
A	US	02SA2M5	49	42.24	2.23	5.27936	f
B	US	02SB1M1	47	48.94	3.13	6.39559	f
B	US	02SB1M2	48	55.45	3.44	6.20379	f
B	US	02SB1M3	44	38.47	1.94	5.04289	m
B	US	02SB1M4	47	43.45	2.32	5.33947	m
B	US	02SB1M5	48	49.53	3.38	6.82415	f
B	US	02SB2M1	46	41.59	1.43	3.43833	m
B	US	02SB2M2	43	32.94	0.94	2.85367	m
B	US	02SB2M3	45	40.35	1.03	2.55266	f
B	US	02SB2M4	43	31.85	0.23	0.722135	f
B	US	02SB2M5	41	34.41	1.07	3.10956	f
A	Small-US	02SA1P1	30	15.38	na	0	nd
A	Small-US	02SA1P2	31	14.61	na	0	nd
A	Small-US	02SA1P3	36	21.59	0.2	0.926355	m
A	Small-US	02SA1P4	36	14.65	na	0	nd
A	Small-US	02SA1P5	30	9.49	na	0	nd
A	Small-US	02SA2P1	38	26.75	0.98	3.66355	nd
A	Small-US	02SA2P2	37	20.8	na	0	nd
A	Small-US	02SA2P3	37	23.93	na	0	nd
A	Small-US	02SA2P4	35	18.95	na	0	nd
A	Small-US	02SA2P5	35	16.55	na	0	nd
B	Small-US	02SB1P1	38	21.9	0.43	1.96347	f
B	Small-US	02SB1P2	34	21.51	0.12	0.55788	m
B	Small-US	02SB1P3	36	22.44	0.86	3.83244	m
B	Small-US	02SB1P4	35	20.93	na	0	nd
B	Small-US	02SB1P5	36	19.13	0.16	0.836383	f
B	Small-US	02SB2P1	35	22.18	na	0	nd
B	Small-US	02SB2P2	31	15.41	na	0	nd
B	Small-US	02SB2P3	37	23.43	na	0	nd
B	Small-US	02SB2P4	32	20.15	na	0	nd
B	Small-US	02SB2P5	33	18.26	na	0	nd
A	CS	03SA1G1	51	64.14	3.17	4.94231	m
A	CS	03SA1G2	54	56.6	5.42	9.57597	f
A	CS	03SA1G3	60	76.53	3.63	4.74324	m
A	CS	03SA1G4	60	88.52	5.79	6.54089	f
A	CS	03SA1G5	55	63.39	2.59	4.08582	m
A	CS	03SA1G6	52	60.45	3.68	6.08768	m
A	CS	03SA1G7	53	66.88	4.11	6.14533	f
A	CS	03SA1G8	53	57.87	4.22	7.29221	m
A	CS	03SA1G9	54	63.05	3.52	5.58287	m
A	CS	03SA1G10	57	78.51	5.11	6.50873	f
A	CS	03SA2G1	53	58.37	2.89	4.95117	m
A	CS	03SA2G2	53	61.45	5.29	8.60862	m
A	CS	03SA2G3	57	78.63	5.62	7.1474	m
A	CS	03SA2G4	62	97.47	6.41	6.57638	m
A	CS	03SA2G5	53	69.33	4.28	6.17337	m
A	CS	03SA2G6	52	64.26	6.71	10.442	f
A	CS	03SA2G7	52	63.38	4.62	7.28937	m
A	CS	03SA2G8	51	64.71	7.1	10.972	f
A	CS	03SA2G9	53	67.55	4.2	6.21762	m
A	CS	03SA2G10	51	56.66	4.36	7.69502	f
B	CS	03SB1G1	53	67.3	2.25	3.34324	m
B	CS	03SB1G2	51	64.48	4.92	7.63027	f
B	CS	03SB1G3	56	76.15	4.11	5.39724	m
B	CS	03SB1G4	55	76.39	3.67	4.80429	f
B	CS	03SB1G5	53	63.44	3.25	5.12295	m
B	CS	03SB1G6	53	71.63	3.49	4.87226	m
B	CS	03SB1G7	54	70.22	6.36	9.05725	f
B	CS	03SB1G8	53	72.33	4.03	5.57169	f
B	CS	03SB1G9	52	65.36	3.98	6.08935	m
B	CS	03SB1G10	51	67.35	3.22	4.78099	m
B	CS	03SB2G1	58	81.88	5.58	6.81485	m
B	CS	03SB2G2	54	63.82	3.85	6.03259	f
B	CS	03SB2G3	58	76.02	6.06	7.97159	m
B	CS	03SB2G4	54	65.6	4.52	6.89024	m
B	CS	03SB2G5	52	54.77	6.06	11.0645	f
B	CS	03SB2G6	57	65.83	3.38	5.13444	m
B	CS	03SB2G7	52	61.42	3.54	5.76359	m
B	CS	03SB2G8	55	58.1	3.81	6.55766	m
B	CS	03SB2G9	50	54.64	4	7.32064	m
B	CS	03SB2G10	53	55.43	2.24	4.04113	f
A	US	03SA1M1	48	49.43	1.47	2.9739	m
A	US	03SA1M2	47	53.45	3.13	5.85594	f
A	US	03SA1M3	45	37.71	1.3	3.44736	f
A	US	03SA1M4	46	45.73	3.06	6.69145	f
A	US	03SA1M5	48	48.02	2.14	4.45648	m
A	US	03SA2M1	43	32.8	1.75	5.33537	f
A	US	03SA2M2	46	37.42	1.25	3.34046	m
A	US	03SA2M3	42	30.03	0.96	3.1968	f
A	US	03SA2M4	44	29.41	0.25	0.850051	f
A	US	03SA2M5	47	32.64	0.9	2.75735	m
B	US	03SB1M1	46	49.13	2.02	4.11154	f
B	US	03SB1M2	48	52.92	4.07	7.69085	f
B	US	03SB1M3	42	35.9	2.4	6.68524	f
B	US	03SB1M4	43	36.4	1.86	5.10989	m
B	US	03SB1M5	45	45.31	2.16	4.76716	m
B	US	03SB2M1	44	41.14	2.71	6.58726	f
B	US	03SB2M2	45	36.7	1.4	3.81471	m
B	US	03SB2M3	49	53.2	1.25	2.34962	m
B	US	03SB2M4	41	30.51	1.64	5.37529	f
B	US	03SB2M5	46	41.19	1.3	3.15611	m
A	Small-US	03SA1P1	37	22.15	0.31	1.39955	m
A	Small-US	03SA1P2	33	15.7	na	0	nd
A	Small-US	03SA1P3	33	18.2	na	0	nd
A	Small-US	03SA1P4	33	19.35	na	0	nd
A	Small-US	03SA1P5	31	13.99	na	0	nd
A	Small-US	03SA2P1	31	13.88	na	0	nd
A	Small-US	03SA2P2	32	17.74	na	0	nd
A	Small-US	03SA2P3	34	19.49	na	0	nd
A	Small-US	03SA2P4	32	15.76	na	0	nd
A	Small-US	03SA2P5	30	13.13	na	0	nd
B	Small-US	03SB1P1	36	22.3	0.35	1.56951	m
B	Small-US	03SB1P2	33	20.2	na	0	nd
B	Small-US	03SB1P3	35	18.93	na	0	nd
B	Small-US	03SB1P4	33	16.99	na	0	nd
B	Small-US	03SB1P5	36	20.4	na	0	nd
B	Small-US	03SB2P1	32	13.86	na	0	nd
B	Small-US	03SB2P2	33	15.4	na	0	nd
B	Small-US	03SB2P3	39	26.68	1.15	4.31034	nd
B	Small-US	03SB2P4	30	12.46	na	0	nd
B	Small-US	03SB2P5	33	15.71	na	0	nd
A	CS	04SA1G1	55	65.51	3.3	5.0374	m
A	CS	04SA1G2	53	49.73	1.6	3.21737	m
A	CS	04SA1G3	56	72.26	5.83	8.06809	m
A	CS	04SA1G4	54	56.13	2.71	4.82808	f
A	CS	04SA1G5	59	77.16	1.33	1.72369	f
A	CS	04SA1G6	56	52.02	3.15	6.05536	m
A	CS	04SA1G7	52	58.32	5.04	8.64198	f
A	CS	04SA1G8	58	67.51	4.92	7.28781	f
A	CS	04SA1G9	52	56.79	3.56	6.26871	m
A	CS	04SA1G10	54	62.76	2.9	4.62078	m
A	CS	04SA2G1	56	65.9	2.39	3.62671	m
A	CS	04SA2G2	52	60.06	2.31	3.84615	m
A	CS	04SA2G3	51	58.79	1.81	3.07875	m
A	CS	04SA2G4	53	59.02	1.48	2.50762	m
A	CS	04SA2G5	62	88.31	3.66	4.14449	f
A	CS	04SA2G6	54	58.46	4.15	7.09887	f
A	CS	04SA2G7	59	86.14	3.84	4.45786	m
A	CS	04SA2G8	54	68.63	2.73	3.97785	m
A	CS	04SA2G9	55	76.74	2.05	2.67136	f
A	CS	04SA2G10	56	66.05	2.49	3.76987	m
B	CS	04SB1G1	54	71.02	3.25	4.57618	m
B	CS	04SB1G2	53	74.7	3.1	4.14993	m
B	CS	04SB1G3	55	74.75	2.96	3.95987	m
B	CS	04SB1G4	50	63.71	2.73	4.28504	f
B	CS	04SB1G5	54	85.19	3.74	4.39019	m
B	CS	04SB1G6	50	62.88	4.64	7.37913	f
B	CS	04SB1G7	53	74.02	7.37	9.95677	f
B	CS	04SB1G8	55	81.57	6.91	8.47125	f
B	CS	04SB1G9	53	69.32	3.16	4.55857	m
B	CS	04SB1G10	56	83.73	6.05	7.22561	f
B	CS	04SB2G1	53	64.39	3.86	5.99472	m
B	CS	04SB2G2	53	63.18	3.55	5.61887	m
B	CS	04SB2G3	54	62.39	5.72	9.16814	f
B	CS	04SB2G4	51	63.79	5.64	8.84151	f
B	CS	04SB2G5	54	68.84	4.38	6.36258	m
B	CS	04SB2G6	53	62.16	3.92	6.30631	m
B	CS	04SB2G7	53	62.83	2.37	3.77208	m
B	CS	04SB2G8	53	62.42	5.65	9.05159	f
B	CS	04SB2G9	53	56.72	2.55	4.49577	m
B	CS	04SB2G10	55	66.17	4.93	7.45051	f
A	US	04SA1M1	49	46.93	3.52	7.50053	f
A	US	04SA1M2	42	36.59	0.89	2.43236	f
A	US	04SA1M3	48	44.25	0.2	0.451977	f
A	US	04SA1M4	40	28.73	0.55	1.91438	m
A	US	04SA1M5	49	51.4	2.02	3.92996	m
A	US	04SA2M1	45	32.1	0.67	2.08723	f
A	US	04SA2M2	48	43.78	1.84	4.20283	f
A	US	04SA2M3	47	40.82	1.28	3.13572	m
A	US	04SA2M4	47	48.63	1.27	2.61156	f
A	US	04SA2M5	49	61.26	3.93	6.41528	m
B	US	04SB1M1	47	43.71	4.56	10.4324	f
B	US	04SB1M2	47	43.48	3.36	7.72769	m
B	US	04SB1M3	43	31.26	0.85	2.71913	f
B	US	04SB1M4	45	40.87	3.36	8.22119	f
B	US	04SB1M5	44	41.33	0.59	1.42753	f
B	US	04SB2M1	47	44.51	2.99	6.71759	f
B	US	04SB2M2	49	37.59	1.8	4.78851	m
B	US	04SB2M3	44	32.22	na	0	nd
B	US	04SB2M4	41	33.15	1.26	3.8009	m
B	US	04SB2M5	43	32.53	1.08	3.32001	m
A	Small-US	04SA1P1	35	18.56	na	0	nd
A	Small-US	04SA1P2	36	18.33	na	0	nd
A	Small-US	04SA1P3	39	25.66	na	0	nd
A	Small-US	04SA1P4	33	16.09	na	0	nd
A	Small-US	04SA1P5	33	16.08	na	0	nd
A	Small-US	04SA2P1	35	16.19	na	0	nd
A	Small-US	04SA2P2	35	16.65	na	0	nd
A	Small-US	04SA2P3	34	18.33	na	0	nd
A	Small-US	04SA2P4	34	17.28	na	0	nd
A	Small-US	04SA2P5	35	17.42	na	0	nd
B	Small-US	04SB1P1	37	25.97	0.61	2.34886	m
B	Small-US	04SB1P2	36	20.9	0.66	3.15789	f
B	Small-US	04SB1P3	34	15.94	na	0	nd
B	Small-US	04SB1P4	38	22.54	0.32	1.4197	f
B	Small-US	04SB1P5	39	27.3	0.35	1.28205	m
B	Small-US	04SB2P1	32	13	0.25	1.92308	m
B	Small-US	04SB2P2	32	14.32	0.21	1.46648	m
B	Small-US	04SB2P3	35	16.7	na	0	nd
B	Small-US	04SB2P4	37	24.07	0.38	1.57873	m
B	Small-US	04SB2P5	34	14.47	na	0	nd
A	CS	05SA1G1	59	73.7	1.07	1.45183	f
A	CS	05SA1G2	54	57.05	0.64	1.12182	m
A	CS	05SA1G3	51	51.36	0.93	1.81075	f
A	CS	05SA1G4	52	65.06	1.11	1.70612	f
A	CS	05SA1G5	55	65.74	1.91	2.90538	m
A	CS	05SA1G6	51	53.25	0.49	0.920188	m
A	CS	05SA1G7	55	62.6	0.91	1.45367	m
A	CS	05SA1G8	62	82.76	2.71	3.27453	f
A	CS	05SA1G9	58	71.45	1.32	1.84745	m
A	CS	05SA1G10	52	56	0.82	1.46429	m
A	CS	05SA2G1	52	53.49	0.37	0.691718	f
A	CS	05SA2G2	51	57.53	1.35	2.3466	m
A	CS	05SA2G3	50	62.59	0.21	0.335517	nd
A	CS	05SA2G4	50	48.65	0.84	1.72662	m
A	CS	05SA2G5	56	74.75	0.81	1.08361	m
A	CS	05SA2G6	52	57.4	0.34	0.592334	nd
A	CS	05SA2G7	50	41.09	0.64	1.55756	m
A	CS	05SA2G8	51	52.95	0.67	1.26534	nd
A	CS	05SA2G9	51	54.65	0.84	1.53705	m
A	CS	05SA2G10	55	70.31	1.47	2.09074	m
B	CS	05SB1G1	57	90	1.61	1.78889	m
B	CS	05SB1G2	60	85.58	0.77	0.899743	f
B	CS	05SB1G3	52	72.1	1.54	2.13592	m
B	CS	05SB1G4	58	81.45	0.94	1.15408	m
B	CS	05SB1G5	54	73.77	1.12	1.51823	m
B	CS	05SB1G6	55	66.24	1.26	1.90217	m
B	CS	05SB1G7	51	59.16	0.98	1.65652	m
B	CS	05SB1G8	53	65.99	1.85	2.80346	m
B	CS	05SB1G9	55	63.74	0.86	1.34923	f
B	CS	05SB1G10	56	70.82	1.1	1.55323	f
B	CS	05SB2G1	56	73.41	1.92	2.61545	m
B	CS	05SB2G2	53	71.51	0.95	1.32849	f
B	CS	05SB2G3	56	69.86	1.12	1.60321	m
B	CS	05SB2G4	52	75.37	2.41	3.19756	f
B	CS	05SB2G5	54	69.35	0.72	1.03821	f
B	CS	05SB2G6	54	71.25	1.04	1.45965	m
B	CS	05SB2G7	53	60.33	0.69	1.14371	m
B	CS	05SB2G8	54	69.39	0.78	1.12408	m
B	CS	05SB2G9	56	80.8	0.79	0.977723	m
B	CS	05SB2G10	52	59.17	1.05	1.77455	m
A	US	05SA1M1	45	40.44	0.51	1.26113	f
A	US	05SA1M2	43	36.87	0.15	0.406835	m
A	US	05SA1M3	41	28.31	0.35	1.23631	f
A	US	05SA1M4	41	28.15	0.39	1.38544	m
A	US	05SA1M5	43	39.01	0.43	1.10228	m
A	US	05SA2M1	45	34.46	0.32	0.928613	m
A	US	05SA2M2	43	35.63	0.26	0.729722	m
A	US	05SA2M3	44	33.35	0.12	0.35982	m
A	US	05SA2M4	44	36.6	0.23	0.628415	f
A	US	05SA2M5	43	32.53	0.33	1.01445	m
B	US	05SB1M1	47	46.79	1.9	4.0607	m
B	US	05SB1M2	47	46.7	0.71	1.52034	m
B	US	05SB1M3	41	32.36	0.66	2.03956	m
B	US	05SB1M4	43	32.03	0.32	0.999063	m
B	US	05SB1M5	41	39.05	0.59	1.51088	f
B	US	05SB2M1	42	37.06	1.27	3.42688	f
B	US	05SB2M2	48	52.48	0.67	1.27668	f
B	US	05SB2M3	44	44.96	na	0	nd
B	US	05SB2M4	43	38.3	0.54	1.40992	nd
B	US	05SB2M5	41	33.94	0.44	1.29641	nd
A	Small-US	05SA1P1	37	21.07	0.08	0.379687	nd
A	Small-US	05SA1P2	36	24.06	0.07	0.290939	nd
A	Small-US	05SA2P1	39	22.13	na	0	nd
A	Small-US	05SA2P2	37	18.27	na	0	nd
A	Small-US	05SA2P3	32	15.05	na	0	nd
A	Small-US	05SA2P4	31	15.05	na	0	nd
A	Small-US	05SA2P5	34	18.14	0.08	0.441014	nd
B	Small-US	05SB1P1	36	16.4	na	0	nd
B	Small-US	05SB1P2	36	20.25	na	0	nd
B	Small-US	05SB1P3	37	23.5	na	0	nd
B	Small-US	05SB1P4	34	18.33	na	0	nd
B	Small-US	05SB1P5	35	19.59	na	0	nd
B	Small-US	05SB2P1	37	24.05	na	0	nd
B	Small-US	05SB2P2	32	17.11	na	0	nd
B	Small-US	05SB2P3	34	19.86	na	0	nd
B	Small-US	05SB2P4	32	17.72	na	0	nd
B	Small-US	05SB2P5	32	16.11	na	0	nd

## Sheet: Tavolara MPA
CreC	Size	Code	TD	TW	GW	GSI	Sex
C	CS	6TA1G1	59	83.18	6.94	8.34335	f
C	CS	6TA1G2	62	97.79	9.28	9.48972	m
C	CS	6TA1G3	62	100.21	5.4	5.38868	m
C	CS	6TA1G4	65	102.06	6.26	6.13365	m
C	CS	6TA1G5	68	130.26	5.85	4.49102	f
C	CS	6TA1G6	54	69.96	4.35	6.21784	f
C	CS	6TA1G7	51	60.61	4	6.59957	m
C	CS	6TA1G8	58	84.04	6.86	8.16278	f
C	CS	6TA2G1	68	127.38	8.03	6.30397	f
C	CS	6TA2G2	70	114.02	4.85	4.25364	m
C	CS	6TA2G3	70	118.67	9.16	7.71888	m
C	CS	6TA2G4	66	121.93	8.78	7.20085	m
C	CS	6TA2G5	69	125.13	13.1	10.4691	f
C	CS	6TA2G6	56	83.61	5.25	6.27915	f
C	CS	6TA2G7	63	90.19	4.58	5.07817	m
C	CS	6TA2G8	55	66.17	5.74	8.67463	f
C	CS	6TA2G9	64	95.47	7.9	8.27485	m
C	CS	6TA2G10	51	46.16	3.35	7.25737	f
C	CS	6TA2G11	63	91.23	4.6	5.0422	m
C	CS	6TA2G12	51	52.68	2.97	5.63781	f
D	CS	6TB1G1	64	107.01	7.59	7.0928	m
D	CS	6TB1G2	65	102.8	9.72	9.45525	f
D	CS	6TB1G3	62	91.6	10.68	11.6594	f
D	CS	6TB1G4	59	86.1	6.98	8.10685	f
D	CS	6TB1G5	59	93.05	9.34	10.0376	f
D	CS	6TB1G6	51	53.9	3.6	6.67904	m
D	CS	6TB1G7	57	83.98	8.31	9.89521	f
D	CS	6TB1G8	60	78.46	7.92	10.0943	f
D	CS	6TB1G9	56	67.02	3.5	5.22232	m
D	CS	6TB1G10	57	81.67	6.4	7.83641	m
D	CS	6TB2G1	61	87.06	5.91	6.78842	M
D	CS	6TB2G2	68	123.21	3.93	3.18968	M
D	CS	6TB2G3	66	103	4.46	4.3301	M
D	CS	6TB2G4	66	104.6	5.63	5.38241	M
D	CS	6TB2G5	67	96.49	3.28	3.39932	M
D	CS	6TB2G6	61	85.12	2.76	3.24248	F
D	CS	6TB2G7	64	93.09	4.17	4.47954	F
D	CS	6TB2G8	62	87.26	4.86	5.56956	M
D	CS	6TB2G9	61	84.93	3.73	4.39185	F
D	CS	6TB2G10	57	74.61	3.38	4.53022	M
C	US	6TA1M1	45	42.14	3.76	8.92264	f
C	US	6TA1M2	45	43.01	2.42	5.6266	m
C	US	6TA1M3	48	47.28	2.39	5.05499	f
C	US	6TA1M4	49	48.42	3.19	6.58819	f
C	US	6TA1M5	49	57	2.83	4.96491	m
C	US	6TA1M6	49	56.31	5.97	10.602	f
C	US	6TA1M7	48	50.62	2.21	4.36586	f
C	US	6TA2M1	45	36.11	1.32	3.6555	f
C	US	6TA2M2	49	50.55	3.59	7.10188	f
C	US	6TA2M3	49	41.67	3.01	7.22342	f
D	US	6TB1M1	45	35.17	1.18	3.35513	f
D	US	6TB1M2	49	48.73	2.44	5.00718	m
D	US	6TB1M3	48	42.7	1.97	4.61358	f
D	US	6TB1M4	48	47.64	2.42	5.07976	nd
D	US	6TB1M5	43	30.23	1.02	3.37413	f
D	US	6TB1M6	45	38	1.77	4.65789	f
D	US	6TB1M7	44	31.16	1.5	4.81386	nd
D	US	6TB2M1	44	48.5	3.17	6.53608	F
D	US	6TB2M2	45	43.43	2.16	4.97352	M
D	US	6TB2M3	45	46.96	1.45	3.08773	M
D	US	6TB2M4	41	27.23	0.38	1.39552	M
D	US	6TB2M5	43	30.68	0.7	2.28162	F
C	Small-US	6TA1P1	31	14.88	na	0	nd
C	Small-US	6TA1P2	30	11.17	na	0	nd
C	Small-US	6TA1P3	35	19.07	0.38	1.99266	nd
C	Small-US	6TA1P4	30	14.24	0.16	1.1236	nd
C	Small-US	6TA1P5	30	9.96	na	0	nd
C	Small-US	6TA2P1	37	21.47	0.23	1.07126	nd
C	Small-US	6TA2P2	31	11.8	0.03	0.254237	nd
C	Small-US	6TA2P3	31	10.52	0.01	0.095057	nd
C	Small-US	6TA2P4	36	17.82	na	0	nd
C	Small-US	6TA2P5	38	20.32	1.73	8.51378	m
C	Small-US	6TA2P6	30	9.69	na	0	nd
D	Small-US	6TB1P1	32	15.28	0.08	0.52356	nd
D	Small-US	6TB1P2	30	11.21	na	0	nd
D	Small-US	6TB1P3	31	13.37	0.33	2.46821	m
D	Small-US	6TB1P4	34	16.06	0.2	1.24533	m
D	Small-US	6TB1P5	30	7.29	na	0	nd
D	Small-US	6TB2P1	33	14.36	na	0	nd
D	Small-US	6TB2P2	33	14.98	na	0	nd
D	Small-US	6TB2P3	36	15.68	0.03	0.191327	nd
D	Small-US	6TB2P4	30	9.23	na	0	nd
D	Small-US	6TB2P5	32	14.19	na	0	nd
D	Small-US	6TB2P6	32	12.15	na	0	nd
C	CS	7TA1G1	57	78.14	6.24	7.98567	f
C	CS	7TA1G2	54	74.47	2.93	3.93447	m
C	CS	7TA1G3	58	86.51	5.46	6.31141	m
C	CS	7TA1G4	58	73.64	4.07	5.52689	m
C	CS	7TA1G5	57	77.12	2.47	3.2028	m
C	CS	7TA1G6	57	76.51	5.8	7.58071	f
C	CS	7TA1G7	59	83.11	5.41	6.50945	f
C	CS	7TA1G8	54	69.13	5.52	7.98496	f
C	CS	7TA1G9	56	74.12	7.05	9.5116	f
C	CS	7TA1G10	58	86.98	4.35	5.00115	m
C	CS	7TA2G1	54	67.82	6.16	9.08287	f
C	CS	7TA2G2	63	100.55	6.22	6.18598	f
C	CS	7TA2G3	64	103.67	5.99	5.77795	f
C	CS	7TA2G4	69	120.26	7.36	6.12007	f
C	CS	7TA2G5	57	85.09	5.9	6.93383	f
C	CS	7TA2G6	61	89.73	4.55	5.07077	m
C	CS	7TA2G7	64	112.16	5.75	5.1266	m
C	CS	7TA2G8	65	104.42	4.97	4.75962	m
C	CS	7TA2G9	59	93.31	5.41	5.79788	f
C	CS	7TA2G10	58	85.22	4.22	4.95189	m
D	CS	7TB1G1	52	67.39	4.4	6.52916	f
D	CS	7TB1G2	51	58.87	3.13	5.3168	f
D	CS	7TB1G3	51	62.03	5.25	8.46365	f
D	CS	7TB1G4	51	55.15	3.35	6.07434	f
D	CS	7TB1G5	60	87.82	7.22	8.22136	f
D	CS	7TB1G6	61	88.15	7.76	8.80318	f
D	CS	7TB1G7	54	73.75	2.88	3.90508	f
D	CS	7TB1G8	51	56.64	1.57	2.77189	m
D	CS	7TB1G9	50	52.04	1.16	2.22905	m
D	CS	7TB1G10	50	51.86	3.05	5.88122	f
D	CS	7TB2G1	72	129.47	9.47	7.31444	f
D	CS	7TB2G2	63	101.91	3.73	3.66009	f
D	CS	7TB2G3	69	122.19	8.01	6.55536	m
D	CS	7TB2G4	71	121.88	5.74	4.70955	f
D	CS	7TB2G5	69	119.49	7.47	6.25157	m
D	CS	7TB2G6	71	116.71	3.9	3.34162	m
D	CS	7TB2G7	58	79.64	5.93	7.44601	f
D	CS	7TB2G8	64	98.55	3.52	3.57179	f
D	CS	7TB2G9	66	106.62	4.02	3.7704	f
D	CS	7TB2G10	66	107.66	4.88	4.53279	m
C	US	7TA1M1	46	46.83	1.19	2.54111	f
C	US	7TA1M2	48	49.37	2.68	5.4284	m
C	US	7TA1M3	48	45.58	0.91	1.99649	f
C	US	7TA1M4	44	39.66	0.97	2.44579	m
C	US	7TA1M5	43	35.81	0.22	0.614354	nd
C	US	7TA2M1	48	43.46	1.36	3.12931	m
C	US	7TA2M2	43	37.7	2.59	6.87003	f
C	US	7TA2M3	46	44.99	0.8	1.77817	m
C	US	7TA2M4	48	51.39	2.25	4.37828	f
C	US	7TA2M5	48	45.96	1.63	3.54656	m
D	US	7TB1M1	48	43.31	1.89	4.36389	f
D	US	7TB1M2	46	37.67	0.99	2.62809	m
D	US	7TB1M3	48	44.6	1.07	2.3991	f
D	US	7TB1M4	48	31.52	1.69	5.36168	f
D	US	7TB1M5	48	44.93	2.07	4.60717	f
D	US	7TB2M1	44	41.09	1.64	3.99124	f
D	US	7TB2M2	40	36.11	0.28	0.775408	f
D	US	7TB2M3	48	43.94	1.73	3.93719	m
D	US	7TB2M4	48	54.27	2.26	4.16436	f
D	US	7TB2M5	48	52.7	1.96	3.71917	m
C	Small-US	7TA1P1	35	20.15	0.11	0.545906	nd
C	Small-US	7TA1P2	37	22.61	na	0	nd
C	Small-US	7TA1P3	38	22.93	na	0	nd
C	Small-US	7TA1P4	35	21.01	na	0	nd
C	Small-US	7TA1P5	38	25.53	na	0	nd
C	Small-US	7TA2P1	36	20.63	na	0	nd
C	Small-US	7TA2P2	36	21.24	0.19	0.894539	nd
C	Small-US	7TA2P3	32	14.98	na	0	nd
C	Small-US	7TA2P4	31	15.75	na	0	nd
C	Small-US	7TA2P5	37	21.09	na	0	nd
D	Small-US	7TB1P1	30	6.63	na	0	nd
D	Small-US	7TB1P2	30	10.32	na	0	nd
D	Small-US	7TB1P3	35	16.76	na	0	nd
D	Small-US	7TB1P4	36	12.52	na	0	nd
D	Small-US	7TB1P5	31	13.22	0.11	0.832073	m
D	Small-US	7TB2P1	35	18.79	na	0	nd
D	Small-US	7TB2P2	32	14.77	0.22	1.48951	m
D	Small-US	7TB2P3	34	17.5	0.15	0.857143	m
D	Small-US	7TB2P4	37	22.23	0.25	1.12461	m
D	Small-US	7TB2P5	35	16.73	na	0	nd
C	CS	8TA1G1	53	60.45	2.49	4.11911	m
C	CS	8TA1G2	58	74.62	2.36	3.16269	f
C	CS	8TA1G3	65	89.5	6.9	7.7095	f
C	CS	8TA1G4	66	101.13	4.18	4.13329	m
C	CS	8TA1G5	65	103.68	4.02	3.87731	m
C	CS	8TA1G6	53	57.88	2.48	4.28473	f
C	CS	8TA1G7	55	56.79	2.81	4.94805	f
C	CS	8TA1G8	52	55.13	2.28	4.13568	f
C	CS	8TA1G9	63	94.19	4.14	4.39537	m
C	CS	8TA1G10	64	93.63	3.46	3.6954	m
C	CS	8TA2G1	66	96.85	3.95	4.07847	m
C	CS	8TA2G2	54	61.71	2.66	4.31048	f
C	CS	8TA2G3	65	95.85	5.89	6.14502	f
C	CS	8TA2G4	70	140.71	6.2	4.40623	m
C	CS	8TA2G5	55	61.01	2.9	4.75332	f
C	CS	8TA2G6	64	98.87	6.53	6.60463	f
C	CS	8TA2G7	61	87.94	3.78	4.29839	m
C	CS	8TA2G8	59	78.57	3.88	4.93827	m
C	CS	8TA2G9	52	49.19	2.45	4.98069	m
C	CS	8TA2G10	60	83.8	5.18	6.18138	f
D	CS	8TB1G1	59	74.32	2.1	2.82562	m
D	CS	8TB1G2	55	67.79	2.79	4.11565	f
D	CS	8TB1G3	58	70.75	2.74	3.87279	m
D	CS	8TB1G4	57	71.56	1.97	2.75293	m
D	CS	8TB1G5	55	63.46	1.69	2.66309	m
D	CS	8TB1G6	57	62.05	2.21	3.56164	m
D	CS	8TB1G7	57	65.13	3.32	5.0975	m
D	CS	8TB1G8	63	95.24	4.44	4.66191	m
D	CS	8TB1G9	57	64.38	1.94	3.01336	m
D	CS	8TB1G10	58	74.85	2.54	3.39345	m
D	CS	8TB2G1	56	76.84	3.71	4.82821	f
D	CS	8TB2G2	52	57.3	2.54	4.43281	m
D	CS	8TB2G3	55	71.28	2.67	3.74579	m
D	CS	8TB2G4	50	56.46	3.38	5.98654	f
D	CS	8TB2G5	54	71.22	2.32	3.25751	m
D	CS	8TB2G6	63	107.54	4.6	4.27748	f
D	CS	8TB2G7	61	89.89	4.3	4.78362	f
D	CS	8TB2G8	60	91.89	5.69	6.19219	f
D	CS	8TB2G9	59	87.7	4.94	5.63284	f
D	CS	8TB2G10	64	127.45	4.15	3.25618	m
C	US	8TA1M1	45	42.98	1.64	3.81573	m
C	US	8TA1M2	44	43.04	1.89	4.39126	f
C	US	8TA1M3	42	36.85	1.08	2.9308	m
C	US	8TA1M4	46	41.86	0.75	1.79169	f
C	US	8TA1M5	49	56.63	2.56	4.52057	f
C	US	8TA2M1	42	37.1	0.96	2.5876	m
C	US	8TA2M2	44	37.34	1.63	4.36529	m
C	US	8TA2M3	42	38.49	0.73	1.8966	f
C	US	8TA2M4	45	36.22	0.64	1.76698	m
D	US	8TB1M1	46	41.23	0.69	1.67354	m
D	US	8TB1M2	47	44.35	1.21	2.7283	f
D	US	8TB1M3	43	35.12	0.5	1.42369	f
D	US	8TB1M4	43	35.07	0.55	1.56829	f
D	US	8TB1M5	45	31.87	0.56	1.75714	m
D	US	8TB2M1	46	42.56	2.15	5.05169	f
D	US	8TB2M2	47	40.09	0.93	2.31978	f
D	US	8TB2M3	42	26.63	0.04	0.150207	nd
D	US	8TB2M4	49	45.7	1.02	2.23195	m
D	US	8TB2M5	47	45.62	0.94	2.0605	f
C	Small-US	8TA1P1	32	17.99	na	0	nd
C	Small-US	8TA1P2	30	12.26	na	0	nd
C	Small-US	8TA1P3	30	13.84	na	0	nd
C	Small-US	8TA1P4	35	22.72	0.36	1.58451	nd
C	Small-US	8TA1P5	35	20.78	0.38	1.82868	nd
C	Small-US	8TA2P1	39	25.8	0.13	0.503876	nd
C	Small-US	8TA2P2	36	23.17	na	0	nd
C	Small-US	8TA2P3	32	15.92	na	0	nd
C	Small-US	8TA2P4	30	16.56	na	0	nd
C	Small-US	8TA2P5	38	24.39	0.25	1.02501	nd
D	Small-US	8TB1P1	38	23.57	0.09	0.381841	nd
D	Small-US	8TB1P2	38	23.69	na	0	nd
D	Small-US	8TB1P3	39	22.28	na	0	nd
D	Small-US	8TB1P4	33	16.74	na	0	nd
D	Small-US	8TB1P5	33	15.24	na	0	nd
D	Small-US	8TB2P1	39	25.28	0.19	0.751582	f
D	Small-US	8TB2P2	38	21.04	0.04	0.190114	nd
D	Small-US	8TB2P3	37	18.85	0.2	1.06101	m
D	Small-US	8TB2P4	31	14.56	0.01	0.0686813	nd
D	Small-US	8TB2P5	39	27.18	0.36	1.3245	f
C	CS	9TA1G1	65	112.96	6.74	5.96671	m
C	CS	9TA1G2	68	121.17	3.29	2.71519	f
C	CS	9TA1G3	56	68.92	2.73	3.96111	m
C	CS	9TA1G4	53	54.52	0.92	1.68745	f
C	CS	9TA1G5	54	55.88	2.52	4.50966	f
C	CS	9TA1G6	59	90.23	6.2	6.87133	f
C	CS	9TA1G7	62	97.18	4.07	4.1881	f
C	CS	9TA1G8	58	81.56	3.7	4.53654	f
C	CS	9TA1G9	56	78.49	2.83	3.60555	m
C	CS	9TA1G10	57	84.13	3.53	4.19589	f
C	CS	9TA2G1	67	125.63	2.49	1.98201	f
C	CS	9TA2G2	65	116.32	6.18	5.31293	f
C	CS	9TA2G3	73	136.01	4.32	3.17624	m
C	CS	9TA2G4	54	67.7	4.7	6.94239	m
C	CS	9TA2G5	55	81.45	2.28	2.79926	m
C	CS	9TA2G6	51	47.92	0.16	0.33389	m
C	CS	9TA2G7	57	83.7	2.03	2.42533	m
C	CS	9TA2G8	52	61.02	1.99	3.26123	f
C	CS	9TA2G9	54	73.96	1.75	2.36614	f
C	CS	9TA2G10	56	74.37	2.09	2.81027	f
D	CS	9TB1G1	57	63.57	1.06	1.66745	m
D	CS	9TB1G2	56	56.63	2.19	3.86721	f
D	CS	9TB1G3	53	55.83	1.3	2.3285	f
D	CS	9TB1G4	64	100.54	4.22	4.19733	f
D	CS	9TB1G5	59	91.75	4.73	5.15531	nd
D	CS	9TB1G6	66	108.93	8.96	8.22547	f
D	CS	9TB1G7	51	49.97	1.55	3.10186	f
D	CS	9TB2G1	61	82.6	3.42	4.14044	f
D	CS	9TB2G2	71	132.54	3.57	2.69353	m
D	CS	9TB2G3	59	77.5	2.06	2.65806	nd
D	CS	9TB2G4	68	108.18	4.13	3.81771	m
D	CS	9TB2G5	68	114.72	7.48	6.52022	f
D	CS	9TB2G6	62	86.65	4.51	5.20485	m
D	CS	9TB2G7	61	87.39	4	4.57718	nd
D	CS	9TB2G8	62	99.17	6.57	6.62499	f
D	CS	9TB2G9	63	98.4	3.79	3.85163	m
D	CS	9TB2G10	65	100.01	2.4	2.39976	nd
C	US	9TA1M1	40	30.88	0.41	1.32772	m
C	US	9TA1M2	47	46.88	1.98	4.22355	f
C	US	9TA1M3	44	33.49	0.38	1.13467	m
C	US	9TA1M4	46	41.54	1.03	2.47954	m
C	US	9TA1M5	46	40.88	1.14	2.78865	m
C	US	9TA2M1	48	43.62	2.69	6.1669	f
C	US	9TA2M2	44	30.2	0.54	1.78808	m
C	US	9TA2M3	48	45.72	0.9	1.9685	f
C	US	9TA2M4	40	24.22	0.39	1.61024	m
D	US	9TB1M1	47	43.45	2.94	6.7664	f
D	US	9TB1M2	45	42.2	0.96	2.27488	f
D	US	9TB1M3	45	33.85	2.04	6.02659	m
D	US	9TB1M4	43	36.36	0.2	0.550055	nd
D	US	9TB1M5	43	34.68	0.77	2.2203	m
D	US	9TB2M1	47	42.5	1.15	2.70588	f
D	US	9TB2M2	45	42.65	0.58	1.35991	nd
D	US	9TB2M3	40	38.61	0.42	1.0878	m
D	US	9TB2M4	48	44.34	0.39	0.879567	nd
D	US	9TB2M5	43	29.54	0.83	2.80975	f
C	Small-US	9TA1P1	36	22	na	0	nd
C	Small-US	9TA1P2	38	23.91	na	0	nd
C	Small-US	9TA1P3	38	24.85	na	0	nd
C	Small-US	9TA1P4	31	16.72	na	0	nd
C	Small-US	9TA1P5	34	18.23	na	0	nd
C	Small-US	9TA2P1	34	13.1	na	0	nd
C	Small-US	9TA2P2	38	22.07	0.21	0.951518	m
C	Small-US	9TA2P3	34	14.72	na	0	nd
C	Small-US	9TA2P4	35	15.9	na	0	nd
C	Small-US	9TA2P5	36	20.24	0.66	3.26087	m
D	Small-US	9TB1P1	36	20.55	na	0	nd
D	Small-US	9TB1P2	39	27.57	0.34	1.23322	nd
D	Small-US	9TB1P3	35	18.43	na	0	nd
D	Small-US	9TB1P4	39	22.38	0.04	0.178731	nd
D	Small-US	9TB1P5	33	12.91	0.1	0.774593	m
D	Small-US	9TB2P1	33	15.85	na	0	nd
D	Small-US	9TB2P2	34	17.9	0.01	0.0558659	nd
D	Small-US	9TB2P3	39	29.28	0.01	0.034153	nd
D	Small-US	9TB2P4	34	23.31	na	0	nd
D	Small-US	9TB2P5	38	19.25	na	0	nd
C	CS	10TA1G1	69	107.99	3.25	3.00954	m
C	CS	10TA1G2	64	102.38	4.58	4.47353	f
C	CS	10TA1G3	66	104.54	2.54	2.42969	f
C	CS	10TA1G4	61	91.39	6.51	7.12332	f
C	CS	10TA1G5	68	114.96	8.55	7.43737	f
C	CS	10TA1G6	71	135.03	3.82	2.829	m
C	CS	10TA1G7	63	95.93	7.47	7.78693	f
C	CS	10TA1G8	65	94.66	4.33	4.57427	f
C	CS	10TA1G9	56	62.28	1.64	2.63327	f
C	CS	10TA1G10	73	124.75	4.49	3.5992	f
C	CS	10TA2G1	71	123.83	9.3	7.5103	f
C	CS	10TA2G2	72	125.32	7.44	5.9368	f
C	CS	10TA2G3	73	131.13	3.6	2.74537	f
C	CS	10TA2G4	71	119.84	2	1.66889	m
C	CS	10TA2G5	72	130.09	5.46	4.19709	f
C	CS	10TA2G6	67	107.36	2.49	2.3193	m
C	CS	10TA2G7	65	104.17	5.57	5.34703	f
C	CS	10TA2G8	64	97.66	3.14	3.21524	m
C	CS	10TA2G9	67	114.08	2.84	2.48948	m
C	CS	10TA2G10	74	133.66	5.78	4.32441	f
D	CS	10TB1G1	66	102.73	2.54	2.4725	m
D	CS	10TB1G2	62	91.45	3.14	3.43357	f
D	CS	10TB1G3	69	133.52	5.39	4.03685	m
D	CS	10TB1G4	73	122.35	1.82	1.48754	m
D	CS	10TB1G5	65	92.01	1.76	1.91284	m
D	CS	10TB1G6	62	87.94	6.06	6.89106	f
D	CS	10TB1G7	63	89.76	1.41	1.57086	f
D	CS	10TB1G8	52	94.46	1.56	1.65149	f
D	CS	10TB1G9	65	93.83	4.79	5.10498	f
D	CS	10TB1G10	51	46.79	1.85	3.95384	m
D	CS	10TB2G1	63	97.58	6.76	6.92765	f
D	CS	10TB2G2	60	88.59	4.1	4.62806	m
D	CS	10TB2G3	58	86.19	3.7	4.29284	f
D	CS	10TB2G4	66	113.41	3.24	2.85689	f
D	CS	10TB2G5	60	89.05	4.64	5.21056	nd
D	CS	10TB2G6	70	115.47	2.78	2.40755	m
D	CS	10TB2G7	60	81.03	3.58	4.41812	m
D	CS	10TB2G8	62	97.04	2.55	2.62778	m
D	CS	10TB2G9	62	91.85	4.08	4.44203	nd
D	CS	10TB2G10	57	84.19	2.75	3.26642	nd
C	US	10TA1M1	45	33.43	0.47	1.40592	f
C	US	10TA1M2	43	35.95	0.1	0.278164	nd
C	US	10TA1M3	45	36.86	0.04	0.108519	nd
C	US	10TA1M4	47	39.12	1.35	3.45092	f
C	US	10TA1M5	44	38.92	0.5	1.28469	nd
C	US	10TA2M1	47	53.8	2.51	4.66543	m
C	US	10TA2M2	45	35	0.39	1.11429	m
C	US	10TA2M3	49	52.61	2.25	4.27675	m
C	US	10TA2M4	44	37.17	0.79	2.12537	f
C	US	10TA2M5	43	21.02	na	0	nd
D	US	10TB1M1	47	43.23	0.74	1.71177	m
D	US	10TB1M2	44	35.42	0.54	1.52456	m
D	US	10TB1M3	43	36.7	0.2	0.544959	m
D	US	10TB1M4	46	40.27	0.59	1.46511	m
D	US	10TB1M5	45	43.19	0.85	1.96805	m
D	US	10TB2M1	43	36.88	0.22	0.596529	m
D	US	10TB2M2	47	46.66	1.4	3.00043	nd
D	US	10TB2M3	46	41.56	0.51	1.22714	m
D	US	10TB2M4	47	43.6	1.75	4.01376	nd
D	US	10TB2M5	48	52.56	1.45	2.75875	m
C	Small-US	10TA1P1	34	17.09	na	0	nd
C	Small-US	10TA1P2	35	17.79	na	0	nd
C	Small-US	10TA1P3	35	22.66	na	0	nd
C	Small-US	10TA1P4	39	24.92	na	0	nd
C	Small-US	10TA1P5	33	16.09	na	0	nd
C	Small-US	10TA2P1	31	14.24	na	0	nd
C	Small-US	10TA2P2	39	25.05	na	0	nd
C	Small-US	10TA2P3	32	15.25	na	0	nd
C	Small-US	10TA2P4	39	23.88	na	0	nd
C	Small-US	10TA2P5	38	21.04	na	0	nd
D	Small-US	10TB1P1	38	25.86	na	0	nd
D	Small-US	10TB1P2	39	29.16	0.25	0.857339	nd
D	Small-US	10TB1P3	39	31.58	0.12	0.379987	nd
D	Small-US	10TB1P4	39	27.15	0.33	1.21547	m
D	Small-US	10TB2P1	38	24.72	na	0	nd
D	Small-US	10TB2P2	39	26.98	0.12	0.444774	nd
D	Small-US	10TB2P3	31	14.39	na	0	nd
D	Small-US	10TB2P4	38	26.82	0.06	0.223714	nd
D	Small-US	10TB2P5	32	15.45	na	0	nd
C	CS	12TA1G1	66	98.59	0.95	0.963587	f
C	CS	12TA1G2	56	61.34	5.76	9.39028	m
C	CS	12TA1G3	56	73.26	0.86	1.1739	f
C	CS	12TA1G4	50	47.73	0.91	1.90656	nd
C	CS	12TA1G5	53	44.23	na	0	nd
C	CS	12TA1G6	70	114.75	1.54	1.34205	nd
C	CS	12TA1G7	69	98.78	3.47	3.51286	nd
C	CS	12TA1G8	63	77.84	2.59	3.32734	nd
C	CS	12TA1G9	66	103.19	2.88	2.79097	f
C	CS	12TA1G10	62	86.13	2.1	2.43817	f
C	CS	12TA2G1	68	119.89	3.36	2.80257	f
C	CS	12TA2G2	80	160	5.88	3.675	m
C	CS	12TA2G3	65	92.34	0.93	1.00715	nd
C	CS	12TA2G4	69	100.56	3.44	3.42084	nd
C	CS	12TA2G5	60	77.91	1.95	2.50289	m
C	CS	12TA2G6	63	92.48	1.63	1.76254	nd
C	CS	12TA2G7	59	83.6	1.51	1.80622	m
C	CS	12TA2G8	65	100.19	2.53	2.5252	nd
C	CS	12TA2G9	67	111.59	4.63	4.14912	f
C	CS	12TA2G10	59	75.48	2.95	3.90832	f
D	CS	12TB1G1	61	93.52	1.75	1.87126	m
D	CS	12TB1G2	58	75.28	3.13	4.15781	f
D	CS	12TB1G3	61	92.5	1.58	1.70811	f
D	CS	12TB1G4	59	90.9	1.64	1.80418	m
D	CS	12TB1G5	57	77.05	1.13	1.46658	m
D	CS	12TB1G6	64	99.94	1.02	1.02061	m
D	CS	12TB1G7	57	76.26	1.15	1.508	m
D	CS	12TB1G8	57	74.98	1.22	1.6271	f
D	CS	12TB1G9	61	97.33	1.2	1.23292	m
D	CS	12TB1G10	57	79.26	1.57	1.98082	f
D	CS	12TB2G1	57	72.59	0.56	0.771456	m
D	CS	12TB2G2	63	107.37	1.09	1.01518	f
D	CS	12TB2G3	64	96.85	1.52	1.56944	m
D	CS	12TB2G4	67	111.92	6.71	5.99535	f
D	CS	12TB2G5	64	111.34	7.64	6.86186	f
D	CS	12TB2G6	63	109.33	0.9	0.823196	f
D	CS	12TB2G7	68	121.01	1.2	0.991654	f
D	CS	12TB2G8	57	81.8	2.22	2.71394	f
D	CS	12TB2G9	56	76.31	1.81	2.3719	m
D	CS	12TB2G10	58	81.7	2.26	2.76622	f
C	US	12TA1M1	47	40.41	0.22	0.54442	f
C	US	12TA1M2	45	41.33	1.14	2.75829	f
C	US	12TA1M3	47	43.59	1.04	2.38587	m
C	US	12TA1M4	47	40.49	0.93	2.29686	f
C	US	12TA1M5	41	25.1	na	0	nd
C	US	12TA2M1	49	39.55	0.31	0.783818	m
C	US	12TA2M2	46	40.55	0.07	0.172626	m
C	US	12TA2M3	48	31.94	0.4	1.25235	m
C	US	12TA2M4	42	21.16	na	0	nd
C	US	12TA2M5	43	30.45	na	0	nd
D	US	12TB1M1	47	47.98	1.66	3.45977	f
D	US	12TB1M2	44	35.03	0.25	0.713674	m
D	US	12TB1M3	45	40.63	0.19	0.467635	f
D	US	12TB1M4	49	48.05	0.56	1.16545	m
D	US	12TB1M5	43	31.96	na	0	nd
D	US	12TB2M1	45	44.31	0.09	0.203114	m
D	US	12TB2M2	43	36.8	0.2	0.543478	m
D	US	12TB2M3	43	34.28	0.38	1.10852	m
D	US	12TB2M4	44	34.54	0.26	0.75275	m
D	US	12TB2M5	42	35.05	0.44	1.25535	f
C	Small-US	12TA1P1	35	17.36	na	0	nd
C	Small-US	12TA1P2	39	23.37	na	0	nd
C	Small-US	12TA1P3	39	28.13	na	0	nd
C	Small-US	12TA1P4	39	26.08	na	0	nd
C	Small-US	12TA2P1	33	14.48	na	0	nd
C	Small-US	12TA2P2	33	16.31	na	0	nd
C	Small-US	12TA2P3	35	18.7	na	0	nd
C	Small-US	12TA2P4	33	14.53	na	0	nd
C	Small-US	12TA2P5	36	21.57	na	0	nd
D	Small-US	12TB1P1	36	22.47	na	0	nd
D	Small-US	12TB1P2	38	20.83	na	0	nd
D	Small-US	12TB1P3	33	17.72	na	0	nd
D	Small-US	12TB1P4	35	18.1	na	0	nd
D	Small-US	12TB1P5	34	17.21	0.04	0.232423	nd
D	Small-US	12TB2P1	32	15.6	na	0	nd
D	Small-US	12TB2P2	36	20.56	na	0	nd
D	Small-US	12TB2P3	38	24.54	0.06	0.244499	f
D	Small-US	12TB2P4	32	14.55	na	0	nd
D	Small-US	12TB2P5	31	14.09	na	0	nd
C	CS	01TA1G1	61	84.8	8.01	9.44575	f
C	CS	01TA1G2	66	94.77	8.1	8.54701	m
C	CS	01TA1G3	62	85.82	3.74	4.35796	f
C	CS	01TA1G4	58	65.61	1.78	2.713	f
C	CS	01TA1G5	62	83.75	3	3.58209	m
C	CS	01TA1G6	50	46.68	1.41	3.02057	m
C	CS	01TA1G7	52	56.98	3.49	6.12496	m
C	CS	01TA1G8	50	58.44	1.2	2.05339	m
C	CS	01TA1G9	54	60.26	1.68	2.78792	nd
C	CS	01TA1G10	63	87.79	5.02	5.71819	f
C	CS	01TA2G1	65	98.97	6.41	6.47671	f
C	CS	01TA2G2	51	56.06	2.1	3.74599	m
C	CS	01TA2G3	56	63.73	2.51	3.93849	m
C	CS	01TA2G4	57	68.99	2.03	2.94246	f
C	CS	01TA2G5	50	49.91	1.18	2.36426	m
C	CS	01TA2G6	51	49.16	1.11	2.25793	f
C	CS	01TA2G7	57	77.35	4.85	6.2702	f
C	CS	01TA2G8	54	70.58	2.92	4.13715	m
C	CS	01TA2G9	51	52.49	0.43	0.819204	f
C	CS	01TA2G10	54	56.62	2.13	3.76192	f
D	CS	01TB1G1	56	74.25	1.8	2.42424	m
D	CS	01TB1G2	59	90.46	4.96	5.48309	f
D	CS	01TB1G3	54	67.89	2.19	3.22581	m
D	CS	01TB1G4	56	78.34	2.16	2.75721	f
D	CS	01TB1G5	51	60.96	3.21	5.26575	f
D	CS	01TB1G6	55	70.47	4.82	6.83979	m
D	CS	01TB1G7	50	59.51	2.19	3.68005	f
D	CS	01TB1G8	50	76.57	3.69	4.81912	m
D	CS	01TB1G9	53	63.01	2.14	3.39629	m
D	CS	01TB1G10	54	70.96	1.59	2.2407	f
D	CS	01TB2G1	62	97.7	3.91	4.00205	f
D	CS	01TB2G2	58	83.75	1.13	1.34925	m
D	CS	01TB2G3	54	67.93	4.31	6.34477	f
D	CS	01TB2G4	57	84.28	3.75	4.44945	m
D	CS	01TB2G5	58	80.48	3.96	4.92048	f
D	CS	01TB2G6	58	79.42	1.62	2.03979	f
D	CS	01TB2G7	59	83.65	7.74	9.25284	f
D	CS	01TB2G8	53	68	1.9	2.79412	f
D	CS	01TB2G9	54	64.17	1.89	2.9453	m
D	CS	01TB2G10	51	50.52	0.59	1.16785	f
C	US	01TA1M1	44	37.35	0.56	1.49933	nd
C	US	01TA1M2	45	41.53	0.71	1.70961	nd
C	US	01TA1M3	45	43.26	0.75	1.7337	nd
C	US	01TA1M4	41	28.64	na	0	nd
C	US	01TA1M5	48	43.69	0.42	0.961318	f
C	US	01TA2M1	44	39.91	2.46	6.16387	m
C	US	01TA2M2	45	32.71	0.45	1.37573	m
C	US	01TA2M3	43	32.93	0.29	0.880656	f
C	US	01TA2M4	45	36.51	1.27	3.4785	f
C	US	01TA2M5	41	29.14	0.7	2.4022	m
D	US	01TB1M1	49	50.91	1.42	2.78924	m
D	US	01TB1M2	40	30.09	0.01	0.0332336	f
D	US	01TB1M3	43	40.38	0.53	1.31253	f
D	US	01TB1M4	46	44.23	0.42	0.949582	f
D	US	01TB1M5	42	36.92	0.56	1.51679	m
D	US	01TB2M1	45	44.51	0.81	1.81982	m
D	US	01TB2M2	47	41.51	0.82	1.97543	m
D	US	01TB2M3	49	53.8	1.44	2.67658	m
D	US	01TB2M4	46	43.43	1.4	3.22358	f
D	US	01TB2M5	45	39	1.47	3.76923	m
C	Small-US	01TA1P1	30	12.37	na	0	nd
C	Small-US	01TA1P2	34	21.41	na	0	nd
C	Small-US	01TA1P3	30	13.6	na	0	nd
C	Small-US	01TA1P4	36	19.74	na	0	nd
C	Small-US	01TA1P5	34	15.39	na	0	nd
C	Small-US	01TA2P1	34	15.33	na	0	nd
C	Small-US	01TA2P2	37	19.07	na	0	nd
C	Small-US	01TA2P3	33	13.39	na	0	nd
C	Small-US	01TA2P4	39	28.2	na	0	nd
C	Small-US	01TA2P5	39	23.82	na	0	nd
D	Small-US	01TB1P1	33	17.37	na	0	nd
D	Small-US	01TB1P2	32	15.73	na	0	nd
D	Small-US	01TB1P3	36	22.68	na	0	nd
D	Small-US	01TB1P4	31	14.53	na	0	nd
D	Small-US	01TB1P5	33	18.43	na	0	nd
D	Small-US	01TB2P1	33	14.93	na	0	nd
D	Small-US	01TB2P2	36	24.86	0.02	0.0804505	nd
D	Small-US	01TB2P3	37	20.36	0.01	0.0491159	nd
D	Small-US	01TB2P4	37	20.95	0.01	0.0477327	nd
D	Small-US	01TB2P5	30	10.7	na	0	nd
C	CS	02TA1G1	58	69.13	3.39	4.9038	m
C	CS	02TA1G2	56	72.6	5.94	8.18182	m
C	CS	02TA1G3	64	96.9	3.94	4.06605	m
C	CS	02TA1G4	62	95.95	4.81	5.01303	m
C	CS	02TA1G5	66	98.81	6.53	6.60864	m
C	CS	02TA1G6	61	81.81	4.78	5.84281	m
C	CS	02TA1G7	59	73.01	6.53	8.94398	f
C	CS	02TA1G8	63	96.64	6.93	7.17094	f
C	CS	02TA1G9	68	110.38	11.63	10.5363	f
C	CS	02TA1G10	68	112.31	6.06	5.39578	m
C	CS	02TA2G1	66	109.41	9.17	8.38132	f
C	CS	02TA2G2	62	98.24	8.05	8.19422	f
C	CS	02TA2G3	72	134.46	5.54	4.12018	m
C	CS	02TA2G4	65	104.93	4.81	4.58401	f
C	CS	02TA2G5	64	93.88	5.85	6.23136	f
C	CS	02TA2G6	64	101.63	10.76	10.5874	f
C	CS	02TA2G7	60	86.87	5.53	6.36583	f
C	CS	02TA2G8	63	99.82	9.25	9.26668	m
C	CS	02TA2G9	59	71.21	2.46	3.45457	m
C	CS	02TA2G10	51	54.8	0.46	0.839416	f
D	CS	02TB1G1	63	93.03	7.61	8.18016	m
D	CS	02TB1G2	61	79.15	2.29	2.89324	f
D	CS	02TB1G3	65	110.73	3.07	2.77251	m
D	CS	02TB1G4	62	98.25	4.26	4.33588	m
D	CS	02TB1G5	62	89.07	6.47	7.26395	f
D	CS	02TB1G6	66	110.91	5.61	5.05816	m
D	CS	02TB1G7	58	86	2.04	2.37209	nd
D	CS	02TB1G8	61	82.1	3.03	3.69062	m
D	CS	02TB1G9	64	106.5	4.95	4.64789	f
D	CS	02TB1G10	66	108.02	2.87	2.65692	m
D	CS	02TB2G1	63	113.27	5.32	4.69674	m
D	CS	02TB2G2	61	87.93	1.55	1.76277	m
D	CS	02TB2G3	59	93.6	4.31	4.6047	m
D	CS	02TB2G4	66	100.14	5.43	5.42241	f
D	CS	02TB2G5	61	90.46	3.26	3.6038	f
D	CS	02TB2G6	56	71.91	3.65	5.07579	m
D	CS	02TB2G7	66	105.01	1	0.95229	nd
D	CS	02TB2G8	57	69.02	5.13	7.43263	f
D	CS	02TB2G9	58	79.45	2.26	2.84456	m
D	CS	02TB2G10	55	70.32	3.41	4.84926	m
C	US	02TA1M1	48	50.39	2.65	5.25898	m
C	US	02TA1M2	45	35.45	1.31	3.69535	f
C	US	02TA1M3	49	48.76	3.58	7.34208	m
C	US	02TA1M4	43	32.37	0.97	2.9966	f
C	US	02TA1M5	45	38.84	1.22	3.14109	m
C	US	02TA2M1	42	32.11	0.4	1.24572	m
C	US	02TA2M2	45	35.51	0.19	0.535061	nd
C	US	02TA2M3	44	41.4	1.29	3.11594	m
C	US	02TA2M4	44	42.68	1.78	4.17057	f
C	US	02TA2M5	48	47.76	2.07	4.33417	m
D	US	02TB1M1	46	43.33	3.45	7.96215	f
D	US	02TB1M2	49	50.95	1.91	3.74877	m
D	US	02TB1M3	49	50.73	3.98	7.84546	m
D	US	02TB1M4	45	42.46	2.68	6.31182	f
D	US	02TB1M5	49	52.23	1.62	3.10167	m
D	US	02TB2M1	46	42.4	1.11	2.61792	f
D	US	02TB2M2	45	40.61	0.21	0.517114	f
C	Small-US	02TA1P1	37	20.81	na	0	nd
C	Small-US	02TA1P2	36	21.53	na	0	nd
C	Small-US	02TA1P3	37	19.38	na	0	nd
C	Small-US	02TA1P4	39	22.61	0.07	0.309598	nd
C	Small-US	02TA1P5	36	19.42	na	0	nd
C	Small-US	02TA2P1	35	17.85	na	0	nd
C	Small-US	02TA2P2	39	26.53	na	0	nd
C	Small-US	02TA2P3	37	19.41	na	0	nd
C	Small-US	02TA2P4	34	15.2	na	0	nd
C	Small-US	02TA2P5	34	18.39	na	0	nd
D	Small-US	02TB1P1	34	15.86	na	0	nd
D	Small-US	02TB1P2	31	13.44	na	0	nd
D	Small-US	02TB1P3	36	22.5	na	0	nd
D	Small-US	02TB1P4	35	17.85	na	0	nd
D	Small-US	02TB1P5	38	21.44	na	0	nd
D	Small-US	02TB2P1	31	15.55	na	0	nd
D	Small-US	02TB2P2	36	21.44	na	0	nd
D	Small-US	02TB2P3	38	23.96	na	0	nd
D	Small-US	02TB2P4	31	14.54	na	0	nd
D	Small-US	02TB2P5	32	16.15	na	0	nd
C	CS	03TA1G1	67	115.3	5.86	5.08239	m
C	CS	03TA1G2	70	138.17	4.1	2.96736	m
C	CS	03TA1G3	63	95.73	6.23	6.50789	f
C	CS	03TA1G4	55	63.19	3.37	5.33312	m
C	CS	03TA1G5	62	91.45	7.56	8.26681	f
C	CS	03TA1G6	58	80.21	5.62	7.00661	m
C	CS	03TA1G7	57	67.59	3.5	5.17828	m
C	CS	03TA1G8	59	79.35	3.93	4.95274	m
C	CS	03TA1G9	51	49.47	3.68	7.43885	f
C	CS	03TA1G10	70	115.4	6.73	5.83189	m
C	CS	03TA2G1	68	119.66	8.88	7.42103	f
C	CS	03TA2G2	64	104.17	5.32	5.10704	f
C	CS	03TA2G3	64	106.39	5.78	5.43284	m
C	CS	03TA2G4	59	91.89	5.31	5.77865	m
C	CS	03TA2G5	58	78.64	3.42	4.34893	f
C	CS	03TA2G6	64	99.67	3.56	3.57179	m
C	CS	03TA2G7	66	95.62	6.62	6.92324	m
C	CS	03TA2G8	65	122.34	4.97	4.06245	m
C	CS	03TA2G9	64	109.15	7.57	6.93541	f
C	CS	03TA2G10	61	90.96	4.94	5.43096	m
D	CS	03TB1G1	60	87.82	4.84	5.51127	m
D	CS	03TB1G2	64	107.53	4.76	4.42667	m
D	CS	03TB1G3	56	82.36	6.91	8.39	f
D	CS	03TB1G4	57	79.22	5.49	6.93007	m
D	CS	03TB1G5	62	99.06	4.21	4.24995	f
D	CS	03TB1G6	64	117.41	5.29	4.50558	m
D	CS	03TB1G7	61	93.05	3.45	3.70768	f
D	CS	03TB1G8	58	90.59	7.09	7.82647	f
D	CS	03TB1G9	63	104.73	5.15	4.91741	m
D	CS	03TB1G10	58	90.25	4.08	4.52078	m
D	CS	03TB2G1	54	66.38	4.89	7.36668	f
D	CS	03TB2G2	66	112.22	4.26	3.79611	m
D	CS	03TB2G3	64	102.43	5.55	5.41833	f
D	CS	03TB2G4	65	103.34	4.53	4.38359	m
D	CS	03TB2G5	60	93.11	3.6	3.86639	m
D	CS	03TB2G6	59	84.71	3.69	4.35604	m
D	CS	03TB2G7	65	96.78	3.82	3.9471	m
D	CS	03TB2G8	65	112.43	5.93	5.27439	m
D	CS	03TB2G9	58	80.4	1.73	2.15174	m
D	CS	03TB2G10	60	87.61	3.12	3.56124	f
C	US	03TA1M1	43	42.54	1.64	3.8552	m
C	US	03TA1M2	42	34.9	1.26	3.61032	f
C	US	03TA1M3	48	52.72	4.63	8.78225	m
C	US	03TA1M4	43	32.65	1.32	4.04288	f
C	US	03TA2M1	42	39.05	0.25	0.640205	m
C	US	03TA2M2	43	37.47	0.56	1.49453	m
C	US	03TA2M3	43	32.86	0.65	1.97809	m
C	US	03TA2M4	41	31.44	0.44	1.39949	f
C	US	03TA2M5	44	36.85	0.89	2.4152	m
D	US	03TB1M1	48	40.28	1.02	2.53227	m
D	US	03TB1M2	45	39.36	2.14	5.43699	f
D	US	03TB1M3	49	50.82	2.41	4.74223	f
D	US	03TB1M4	48	39.2	0.49	1.25	f
D	US	03TB1M5	41	28.61	0.2	0.699056	f
D	US	03TB2M1	45	45.35	0.32	0.705623	m
D	US	03TB2M2	43	25.95	0.1	0.385356	m
D	US	03TB2M3	42	34.15	0.2	0.585652	m
D	US	03TB2M4	45	37.72	0.84	2.22694	m
D	US	03TB2M5	44	33.34	0.15	0.44991	f
C	Small-US	03TA1P1	33	17.8	na	0	nd
C	Small-US	03TA1P2	34	15.57	na	0	nd
C	Small-US	03TA1P3	30	13.91	na	0	nd
C	Small-US	03TA1P4	32	14.79	na	0	nd
C	Small-US	03TA1P5	35	20.85	na	0	nd
C	Small-US	03TA2P1	37	24.57	0.21	0.854701	nd
C	Small-US	03TA2P2	36	25.37	0.21	0.827749	nd
C	Small-US	03TA2P3	36	22.29	na	0	nd
C	Small-US	03TA2P4	39	25.6	na	0	nd
C	Small-US	03TA2P5	38	23.22	na	0	nd
D	Small-US	03TB1P1	35	20.62	na	0	nd
D	Small-US	03TB1P2	35	12.5	0.29	2.32	f
D	Small-US	03TB1P3	33	18.33	na	0	nd
D	Small-US	03TB1P4	34	18.7	na	0	nd
D	Small-US	03TB1P5	34	16.34	na	0	nd
D	Small-US	03TB2P1	35	22.94	na	0	nd
D	Small-US	03TB2P2	37	21.05	na	0	nd
D	Small-US	03TB2P3	36	21.51	na	0	nd
D	Small-US	03TB2P4	37	23.96	na	0	nd
D	Small-US	03TB2P5	35	18.92	na	0	nd
C	CS	04TA1G1	54	59.46	1.96	3.29633	m
C	CS	04TA1G2	69	120.77	4.16	3.44456	f
C	CS	04TA1G3	62	64.75	2.41	3.72201	f
C	CS	04TA1G4	66	111.88	1.78	1.59099	m
C	CS	04TA1G5	55	68.21	2.89	4.23692	f
C	CS	04TA1G6	53	48.41	1.19	2.45817	m
C	CS	04TA1G7	55	66.65	1.21	1.81545	f
C	CS	04TA1G8	60	93.71	3.57	3.80963	f
C	CS	04TA1G9	58	73.75	3.31	4.48814	f
C	CS	04TA1G10	62	89.88	2.96	3.29328	m
C	CS	04TA2G1	62	89.65	2.21	2.46514	f
C	CS	04TA2G2	65	121.45	1.93	1.58913	m
C	CS	04TA2G3	58	66.74	1	1.49835	m
C	CS	04TA2G4	60	88.78	0.72	0.810993	f
C	CS	04TA2G5	58	73.36	1.26	1.71756	m
C	CS	04TA2G6	53	70	1.98	2.82857	m
C	CS	04TA2G7	60	86.02	1.3	1.51128	m
C	CS	04TA2G8	59	89.98	2.53	2.81174	m
C	CS	04TA2G9	62	94.98	2.57	2.70583	f
C	CS	04TA2G10	57	80.41	4.11	5.1113	m
D	CS	04TB1G1	56	86.31	2.48	2.87336	f
D	CS	04TB1G2	51	60.53	1.5	2.47811	m
D	CS	04TB1G3	56	78.04	0.88	1.12763	m
D	CS	04TB1G4	52	67.99	0.73	1.07369	m
D	CS	04TB1G5	52	74.51	0.91	1.22131	m
D	CS	04TB1G6	54	72.64	2.08	2.86344	m
D	CS	04TB1G7	64	112.49	2.15	1.91128	m
D	CS	04TB1G8	59	83.58	2.06	2.4647	f
D	CS	04TB1G9	62	101.32	9.11	8.99131	f
D	CS	04TB1G10	66	118.79	1.97	1.65839	f
D	CS	04TB2G1	52	61.36	1.41	2.29791	m
D	CS	04TB2G2	54	65.47	1.08	1.64961	m
D	CS	04TB2G3	53	65.87	0.81	1.22969	m
D	CS	04TB2G4	53	65.03	0.81	1.24558	m
D	CS	04TB2G5	63	91.18	1.28	1.40382	f
D	CS	04TB2G6	51	57.13	1.4	2.45055	m
D	CS	04TB2G7	57	84.22	1.54	1.82854	m
D	CS	04TB2G8	65	98.85	1.71	1.72989	m
D	CS	04TB2G9	56	72.55	1.56	2.15024	f
D	CS	04TB2G10	50	55.09	1.02	1.85152	m
C	US	04TA1M1	48	35.72	0.48	1.34378	m
C	US	04TA1M2	49	41.04	0.69	1.68129	f
C	US	04TA1M3	46	43.3	0.63	1.45497	m
C	US	04TA1M4	40	26.89	0.82	3.04946	m
C	US	04TA1M5	45	33.95	0.51	1.50221	m
C	US	04TA2M1	48	39.55	0.61	1.54235	m
C	US	04TA2M2	47	39.95	0.6	1.50188	m
C	US	04TA2M3	44	33.15	0.4	1.20664	m
C	US	04TA2M4	46	41.01	0.27	0.658376	m
C	US	04TA2M5	47	39.86	0.68	1.70597	m
D	US	04TB1M1	44	41.44	0.64	1.5444	m
D	US	04TB1M2	43	37.66	0.48	1.27456	nd
D	US	04TB1M3	49	52.04	0.7	1.34512	f
D	US	04TB1M4	48	53.12	1.38	2.59789	m
D	US	04TB1M5	49	51.95	0.69	1.3282	m
D	US	04TB2M1	47	39.49	0.54	1.36743	nd
D	US	04TB2M2	47	43.35	0.91	2.09919	m
D	US	04TB2M3	48	51.96	5.1	9.81524	f
D	US	04TB2M4	42	38.56	0.69	1.78942	m
D	US	04TB2M5	42	36.53	0.38	1.04024	nd
C	Small-US	04TA1P1	34	19.39	na	0	nd
C	Small-US	04TA1P2	36	18.82	na	0	nd
C	Small-US	04TA1P3	38	27.75	0.2	0.720721	nd
C	Small-US	04TA1P4	33	13.62	na	0	nd
C	Small-US	04TA2P1	33	14.49	na	0	nd
C	Small-US	04TA2P2	32	13.67	na	0	nd
C	Small-US	04TA2P3	34	16.21	na	0	nd
C	Small-US	04TA2P4	38	19.41	na	0	nd
C	Small-US	04TA2P5	35	20.77	na	0	nd
D	Small-US	04TB1P1	39	23.97	na	0	nd
D	Small-US	04TB1P2	34	17.37	na	0	nd
D	Small-US	04TB1P3	33	18.05	na	0	nd
D	Small-US	04TB1P4	33	15.45	na	0	nd
D	Small-US	04TB1P5	32	15.83	na	0	nd
D	Small-US	04TB2P1	35	19.68	na	0	nd
D	Small-US	04TB2P2	37	22.14	na	0	nd
D	Small-US	04TB2P3	37	24.33	na	0	nd
D	Small-US	04TB2P4	35	20.06	na	0	nd
D	Small-US	04TB2P5	34	19.67	0.26	1.32181	m
C	CS	05TA1G1	69	132.63	3.53	2.66154	m
C	CS	05TA1G2	59	79.44	2.46	3.09668	m
C	CS	05TA1G3	69	117.69	2.87	2.43861	m
C	CS	05TA1G4	64	97.7	3.8	3.88946	f
C	CS	05TA1G5	69	110.72	4.35	3.92883	m
C	CS	05TA1G6	69	112.5	4.52	4.01778	f
C	CS	05TA1G7	61	90.77	1.98	2.18134	m
C	CS	05TA1G8	63	86.87	3.72	4.28226	f
C	CS	05TA1G9	64	90.37	2.57	2.84386	m
C	CS	05TA1G10	55	66.36	1.29	1.94394	f
C	CS	05TA2G1	62	83.45	1.55	1.8574	m
C	CS	05TA2G2	52	53.8	0.98	1.82156	m
C	CS	05TA2G3	52	53.25	1.29	2.42254	m
C	CS	05TA2G4	65	110.43	5.91	5.35181	f
C	CS	05TA2G5	66	104.63	1.57	1.50053	m
C	CS	05TA2G6	52	57.88	1.48	2.55701	m
C	CS	05TA2G7	60	85.39	1.69	1.97915	m
C	CS	05TA2G8	73	140.21	2.62	1.86863	f
C	CS	05TA2G9	73	149.77	4.54	3.03131	m
C	CS	05TA2G10	70	126.6	2.63	2.07741	m
D	CS	05TB1G1	62	96.21	3.51	3.64827	f
D	CS	05TB1G2	55	67.84	1.72	2.53538	f
D	CS	05TB1G3	54	57.67	1.04	1.80336	f
D	CS	05TB1G4	61	89.07	1.97	2.21174	f
D	CS	05TB1G5	64	97.53	na	0	nd
D	CS	05TB1G6	59	74.29	2.44	3.28443	m
D	CS	05TB1G7	54	62.08	3.84	6.18557	m
D	CS	05TB1G8	58	88.38	2.33	2.63634	f
D	CS	05TB1G9	62	96.86	4.89	5.04852	f
D	CS	05TB1G10	59	79.73	na	0	nd
D	CS	05TB2G1	62	102.13	7.22	7.06942	f
D	CS	05TB2G2	57	80.98	7.61	9.39738	f
D	CS	05TB2G3	63	108.79	5.47	5.02804	m
D	CS	05TB2G4	63	107.35	4.85	4.51793	m
D	CS	05TB2G5	66	131.14	2.46	1.87586	m
D	CS	05TB2G6	58	95.4	2.85	2.98742	f
D	CS	05TB2G7	63	131.98	5.39	4.08395	f
D	CS	05TB2G8	59	112.57	3.95	3.50893	f
D	CS	05TB2G9	59	98.95	3.1	3.1329	f
D	CS	05TB2G10	57	83.01	2.82	3.39718	m
C	US	05TA1M1	49	45.97	0.97	2.11007	f
C	US	05TA1M2	40	30.68	0.17	0.554107	m
C	US	05TA1M3	48	41.61	0.87	2.09084	m
C	US	05TA1M4	43	29.42	0.28	0.951734	m
C	US	05TA1M5	44	36.41	0.3	0.823949	m
C	US	05TA2M1	46	39.58	0.6	1.51592	f
C	US	05TA2M2	43	29.67	0.05	0.16852	nd
C	US	05TA2M3	43	29.13	na	0	nd
C	US	05TA2M4	47	35.83	0.57	1.59085	m
C	US	05TA2M5	42	25.62	0.15	0.58548	m
D	US	05TB1M1	49	44.82	0.43	0.959393	m
D	US	05TB1M2	49	51.34	2.24	4.36307	f
D	US	05TB1M3	46	41.09	0.68	1.6549	m
D	US	05TB1M4	42	30.96	0.24	0.775194	m
D	US	05TB1M5	41	28.22	na	0	nd
D	US	05TB2M1	45	46.3	0.98	2.11663	nd
D	US	05TB2M2	41	29.2	na	0	nd
D	US	05TB2M3	44	35.82	na	0	nd
D	US	05TB2M4	43	35.29	0.43	1.21848	nd
D	US	05TB2M5	42	36.78	0.75	2.03915	m
C	Small-US	05TA1P1	33	13.31	na	0	nd
C	Small-US	05TA1P2	35	16.67	na	0	nd
C	Small-US	05TA1P3	31	12.37	na	0	nd
C	Small-US	05TA1P4	34	15.87	na	0	nd
C	Small-US	05TA2P1	36	17.01	na	0	nd
C	Small-US	05TA2P2	39	21.05	na	0	nd
C	Small-US	05TA2P3	34	14.42	na	0	nd
C	Small-US	05TA2P4	34	14.81	na	0	nd
D	Small-US	05TB1P1	33	16.15	na	0	nd
D	Small-US	05TB1P2	31	13.53	na	0	nd
D	Small-US	05TB1P3	35	18.25	na	0	nd
D	Small-US	05TB1P4	31	14.58	na	0	nd
D	Small-US	05TB1P5	30	12.52	na	0	nd
D	Small-US	05TB2P1	30	11.6	na	0	nd
D	Small-US	05TB2P2	32	12.98	na	0	nd
D	Small-US	05TB2P3	35	17.19	na	0	nd
D	Small-US	05TB2P4	34	17.45	na	0	nd
D	Small-US	05TB2P5	38	26.52	na	0	nd
