# Supplementary material for: Hard time to be parents? Sea urchin fishery shifts potential reproductive contribution of population onto the shoulders of the young adults
Source: PeerJ. 2017 Mar 8;5:e3067. doi: 10.7717/peerj.3067 (PMC5345490; doi:10.7717/peerj.3067)
Supplement: Supplemental Information 9 — This dataset shows the number of fertilized/not fertilized eggs counted, the percentage of the effectively fertilized eggs, the number of echinoplutei counted and the percentage of achievement of the first larval stage. [file peerj-05-3067-s009.xls]

## Sheet: Su Pallosu Bay
Month	Size	Code	1_fert	1_nofert	%fec	2_fert	2_nofert	%fec	3_fert	3_nofert	%fec	4_fert	4_nofert	%fec	5_fert	5_nofert	%fec	1_4-arms	1_other_stg	%dev	2_4-arms	2_other_stg	%dev	3_4-arms	3_other_stg	%dev	4_4-arms	4_other_stg	%dev	5_4-arms	5_other_stg	%dev
Dec	US	12SB2M5	28	1	96.5517	32	0	100	29	3	90.625	32	3	91.4286	40	3	93.0233
Dec	US	12SB1M3	15	2	88.2353	30	2	93.75	7	3	70	13	2	86.6667	26	2	92.8571
Jan	US	01SB1M1	77	20	79.3814	80	21	79.2079	119	23	83.8028	259	70	78.7234	48	13	78.6885	10	0	100	11	0	100	15	0	100	7	0	100	9	0	100
Jan	US	01SB2M5	39	4	90.6977	62	2	96.875	33	2	94.2857	42	3	93.3333	63	1	98.4375	11	0	100	22	0	100	24	0	100	26	0	100	18	0	100
Feb	US	02SA2M5	142	2	98.6111	262	6	97.7612	77	6	92.7711	110	3	97.3451	142	2	98.6111	30	0	100	20	0	100	40	0	100	26	0	100	24	0	100
Feb	US	02SB2M5	149	14	91.411	150	10	93.75	175	6	96.6851	167	9	94.8864	170	14	92.3913	24	0	100	23	0	100	21	0	100	33	0	100	18	0	100
Feb	US	02SB1M1	235	34	87.3606	253	36	87.5433	280	38	88.0503	292	40	87.9518	274	39	87.5399	27	0	100	32	0	100	23	0	100	26	0	100	22	0	100
Mar	US	03SA2M1	54	1	98.1818	26	0	100	60	1	98.3607	39	2	95.122	33	2	94.2857	34	0	100	13	0	100	26	0	100	35	0	100	16	0	100
Mar	US	03SA1M4	38	2	95	47	0	100	58	4	93.5484	66	3	95.6522	39	2	95.122	9	0	100	9	0	100	6	0	100	6	0	100	7	0	100
Mar	US	03SB1M3	230	9	96.2343	420	8	98.1308	185	18	91.133	266	16	94.3262	180	4	97.8261	13	0	100	16	0	100	13	0	100	24	1	96	23	0	100
Mar	US	03SB1M2	121	9	93.0769	189	7	96.4286	178	13	93.1937	216	6	97.2973	233	6	97.4895	21	0	100	20	0	100	26	0	100	23	1	95.8333	23	0	100
Apr	US	04SB2M1	117	25	82.3944	111	18	86.0465	74	15	83.1461	44	12	78.5714	199	29	87.2807	19	0	100	18	0	100	22	0	100	26	0	100	24	0	100
Apr	US	04SA1M1	92	3	96.8421	113	4	96.5812	101	8	92.6606	307	9	97.1519	146	8	94.8052	14	0	100	20	0	100	18	0	100	19	0	100	20	0	100
Apr	US	04SB1M4	119	5	95.9677	180	7	96.2567	115	3	97.4576	111	3	97.3684	126	5	96.1832	3	0	100	14	3	82.3529	14	6	70	17	3	85	13	4	76.4706
Apr	US	04SB1M1	87	10	89.6907	95	9	91.3462	72	8	90	113	8	93.3884	75	5	93.75	24	1	96	28	0	100	32	2	94.1176	26	0	100	20	2	90.9091

## Sheet: Tavolara MPA
Month	Size	Code	1_fert	1_nofert	%fec	2_fert	2_nofert	%fec	3_fert	3_nofert	%fec	4_fert	4_nofert	%fec	5_fert	5_nofert	%fec	1_4-arms	1_other_stg	%dev	2_4-arms	2_other_stg	%dev	3_4-arms	3_other_stg	%dev	4_4-arms	4_other_stg	%dev	5_4-arms	5_other_stg	%dev
Dec	US	12TA1M2	4	0	100	3	1	75	13	1	92.8571	1	0	100	1	0	100
Dec	US	12TB1M1	46	4	92	41	5	89.1304	26	6	81.25	86	18	82.6923	11	2	84.6154
Jan	US	01TB2M4	37	2	94.8718	114	8	93.4426	71	4	94.6667	38	4	90.4762	25	1	96.1538	7	0	100	9	0	100	3	0	100	9	0	100	8	0	100
Feb	US	02TB1M4	71	0	100	75	1	98.6842	58	10	85.2941	62	7	89.8551	155	2	98.7261	7	0	100	17	0	100	25	0	100	27	0	100	32	0	100
Feb	US	02TB2M1	26	7	78.7879	9	2	81.8182	8	4	66.6667	17	1	94.4444	20	1	95.2381	45	0	100	45	1	97.8261	44	0	100	54	0	100	49	0	100
Feb	US	02TA2M4	62	0	100	24	3	88.8889	60	3	95.2381	22	3	88	100	5	95.2381	41	0	100	22	1	95.6522	11	0	100	27	0	100	22	0	100
Mar	US	03TB1M3	140	14	90.9091	202	8	96.1905	86	4	95.5556	44	4	91.6667	174	19	90.1554	19	0	100	23	0	100	27	1	96.4286	24	0	100	23	0	100
Apr	US	04TB1M3	36	3	92.3077	49	6	89.0909	42	5	89.3617	51	4	92.7273	51	2	96.2264	29	0	0	18	0	100	30	0	100	22	0	100	29	0	100
Apr	US	04TB2M3	137	13	91.3333	159	15	91.3793	119	11	91.5385	243	12	95.2941	156	11	93.4132	17	0	0	12	2	85.7143	11	0	100	14	0	100	13	0	100
